1

2 **S-adenosylmethionine synthases specify distinct H3K4me3 populations and gene**  
3 **expression patterns during heat stress**

4

5 Adwait A. Godbole<sup>1</sup>, Sneha Gopalan<sup>2</sup>, Thien-Kim Nguyen<sup>1</sup>, Alexander Munden<sup>1</sup>, Paula  
6 Vo<sup>1</sup>, Caroline A. Lewis<sup>1</sup>, Jessica B. Spinelli<sup>1,2</sup>, Thomas G. Fazzio<sup>2</sup>, Amy K. Walker<sup>1</sup>

7

8

9 1. Program in Molecular Medicine, UMASS Chan Medical School, Worcester, MA  
10 01605

11 2. Cancer Center, UMASS Chan Medical School, Worcester, MA 01605

12 3. Department of Molecular, Cell, and Cancer Biology, UMASS Chan Medical  
13 School, Worcester, MA 01605

14

15 **Abstract**

16 Methylation is a widely occurring modification that requires the methyl donor S-  
17 adenosylmethionine (SAM) and acts in regulation of gene expression and other  
18 processes. SAM is synthesized from methionine, which is imported or generated  
19 through the 1-carbon cycle (1CC). Alterations in 1CC function have clear effects on  
20 lifespan and stress responses, but the wide distribution of this modification has made  
21 identification of specific mechanistic links difficult. Exploiting a dynamic stress-induced  
22 transcription model, we find that two SAM synthases in *Caenorhabditis elegans*, SAMS-  
23 1 and SAMS-4, contribute differently to modification of H3K4me3, gene expression and  
24 survival. We find that *sams-4* enhances H3K4me3 in heat shocked animals lacking  
25 *sams-1*, however, *sams-1* cannot compensate for *sams-4*, which is required to survive  
26 heat stress. This suggests that the regulatory functions of SAM depend on its  
27 enzymatic source and that provisioning of SAM may be an important regulatory step  
28 linking 1CC function to phenotypes in aging and stress.

29

30

31

32

33

34

35

36

## 37 **Introduction**

38 The 1-Carbon cycle (1CC) is a group of interconnected pathways that link essential  
39 nutrients such as methionine, folate and vitamin B12 to the production of nucleotides,  
40 glutathione, and S-adenosylmethionine (SAM), the major methyl donor <sup>1</sup> (**Fig1A**). SAM  
41 is important for the production of polyamines and phosphatidylcholine (PC), a  
42 methylated phospholipid, and is also essential for the methylation of RNA, DNA and  
43 proteins such as histones <sup>2</sup>. Thus, 1CC connects nutrients with the production of a key  
44 cellular regulator of epigenetic function, SAM.

45  
46 Alterations in 1CC function can cause a variety of defects <sup>1</sup>, including intriguing  
47 connections between this cycle, stress responses and aging. Lifespan lengthens in  
48 yeast, *C. elegans*, *Drosophila* and rodent models when methionine is restricted, genes  
49 in the methionine-SAM (Met-SAM) cycle are mutated, or polyamines are supplemented  
50 <sup>3</sup>. While multiple aspects of 1CC function could affect aging, the Met-SAM cycle has  
51 particularly strong links. For example, a *C. elegans* SAM synthase, *sams-1*, was  
52 identified in a screen for long-lived animals <sup>4</sup> and multiple SAM-utilizing histone  
53 methyltransferases are also implicated as aging regulators <sup>5-7</sup>. Of bioactive molecules,  
54 SAM is second only to ATP in cellular abundance <sup>8</sup>, which raises the question of how  
55 such an abundant metabolite can exert specific phenotypic effects. Strikingly, studies in  
56 multiple organisms from a variety of labs have shown that reduction in SAM levels  
57 preferentially affects H3K4me3 levels <sup>9-12</sup>. However, changes in SAM production may  
58 affect other histone modifications as well. For example, the Gasser lab showed that  
59 *sams-1* and *sams-3* have distinct roles in heterochromatin formation, which involves

60 H3K9me3<sup>13</sup> A yeast SAM synthase has also been shown to act as part of the SESAME  
61 histone modification complex<sup>14</sup> or to cooperate with the SIN3 repressor<sup>15</sup>. In addition,  
62 most eukaryotes have more than one SAM synthase, which could allow partitioning of  
63 enzyme output by developmental stage, tissue type or cellular process and underlie  
64 specific phenotypic effects. Indeed, in budding yeast, SAM1 and SAM2 are co-  
65 expressed but regulated by different metabolic events, have distinct posttranslational  
66 modifications, and act differently in phenotypes such as genome stability<sup>16</sup>. The two  
67 SAM synthases present in mammals are expressed in distinct tissues: MAT2A is  
68 present throughout development and in most adult tissues, whereas MAT1A is specific  
69 to adult liver<sup>17</sup>. MAT2A may be present in distinct regulatory conformations with its  
70 partner MAT2B<sup>17</sup>. However, the distinct molecular mechanisms impacted by these  
71 synthases are less clear. Studies exploring specificity of metazoan SAM synthase  
72 function have been difficult, as MAT1A expression decreases *ex vivo* and MAT2A is  
73 essential for cell viability<sup>18</sup>. Finally, the high methionine content of traditional cell  
74 culture media has limited functional studies<sup>19</sup>.

75

76 We have explored SAM synthase function in *C. elegans*, where the gene family has  
77 undergone an expansion. In *C. elegans*, genetic and molecular assays allow separation  
78 of SAM synthase expression and function *in vivo*. Furthermore, no single SAM  
79 synthase is required for survival in normal laboratory conditions or diets. *sams-1* and  
80 the highly similar *sams-3/sams-4* are expressed in adult animals, whereas *sams-5* is  
81 present at low levels in adults and *sams-2* is a pseudogene<sup>20</sup>. We previously found  
82 that *sams-1* had multiple distinct functions, contributing to PC pools and stimulating lipid

83 synthesis through a feedback loop involving *sbp-1*/SREBP-1<sup>21</sup> as well as regulating  
84 global H3K4me3 levels in intestinal nuclei<sup>12</sup>. Our studies also showed that loss of  
85 *sams-1* produced different phenotypes in bacterial or heat stress. While *sams-1* was  
86 necessary for pathogen challenge, promoter H3K4me3 and expression of immune  
87 genes, animals surprisingly survived better during heat shock when they lacked *sams-1*  
88<sup>12</sup>. Because heat shocked animals require the H3K4me3 methyltransferase *set-16/MLL*  
89 for survival, we hypothesized that SAM from a different source may be important for  
90 histone methylation and survival in the heat shock response. Here, we find that SAM  
91 source impacts the functional outputs of methylation. While the SAM and the 1CC are  
92 well associated with regulation of lifespan and stress responses, direct molecular  
93 connections have been difficult to discover. Mechanisms controlling provisioning of  
94 SAM, therefore, could provide a critical level of regulation in these processes. We show  
95 that *sams-1* and *sams-4* differentially affect different populations of histone methylation  
96 and thus gene expression in the heat shock response, and that their loss results in  
97 opposing phenotypes. Our study demonstrates that SAM synthases have a critical  
98 impact on distinct methylation targets and phenotypes associated with the stress  
99 response. Thus, defining the specificity of SAM synthases may provide a method to  
100 identify from broad effects methylation events that are specific phenotypic drivers.

101

102

103

104

105

## 106 **Results**

### 107 ***sams-1* and *sams-4* have overlapping and distinct expression patterns and gene** 108 **regulatory effects**

109 Animals respond to stress by activating specialized protective gene expression  
110 programs<sup>22</sup>. While these programs depend on specific signaling and transcriptional  
111 activators, they may also be impacted by histone methylation and the production of  
112 SAM. For example, we found that *C. elegans* lacking *sams-1* die rapidly on pathogenic  
113 bacteria, have low global H3K4me3 and fail to upregulate immune response genes<sup>12</sup>.  
114 In contrast, heat shocked animals survive better without *sams-1*<sup>23</sup>. *sams-1(RNAi)*  
115 animals induced heat shock genes to normal levels and acquired additional changes in  
116 the transcriptome, including downregulation of many metabolic genes. However, the  
117 H3K4me3 methyltransferase *set-16/MLL* was essential for survival<sup>23</sup>, suggesting that  
118 methylation was required. We hypothesized that other SAM synthases could play an  
119 important role in mediating survival during heat shock (**Fig1A**).

120  
121 In order to test these hypotheses, we first compared expression of each synthase, SAM  
122 levels and gene expression after RNAi in adult unstressed animals. ModEncode data<sup>24</sup>  
123 from young adult animals shows that in young adult levels, *sams-1* is expressed at the  
124 highest levels, comparable to the metabolic enzyme GAPDH (*gpdh-1*) (**FigS1A**). *sams-*  
125 *3* and *sams-4* are expressed at lower levels, but comparable to other enzymes of the 1-  
126 Carbon cycle such as *metr-1*, whereas *sams-5* is minimally expressed (**FigS1A**). In  
127 order to determine the tissue-specific patterns of the SAM synthases expressed in adult  
128 animals, we obtained strains where each protein was tagged with RFP, GFP or mKate,

129 via CRISPR (**Fig1B, FigS1B, C**). RFP::*sams-1* and GFP::*sams-4* animals were also  
130 crossed to allow visualize expression of both synthases (**Fig1B**). RFP::SAMS-  
131 1fluorescence was evident in much of the adult animal, including intestine, hypodermis  
132 and cells in the head (**Fig1B, FigS1B**), in line with mRNA expression patterns derived  
133 from tissue-specific RNA seq<sup>25</sup>. However, RFP::SAMS-1was not present in the  
134 germline, which did express GFP::SAMS-4 and SAMS-3::mKate (**Fig1B, S1C**).  
135 GFP::SAMS-4 and SAMS-3::mKate was also present in intestinal and hypodermal cells  
136 (**Fig1B, FigS1C**), demonstrating that these tissues, which are major contributors to the  
137 stress response<sup>26</sup> contain each of these SAM synthases. *sams-3* and *sams-4* are  
138 expressed bidirectionally from the same promoter and share 95% sequence identity at  
139 the nucleotide level thus RNAi targeting is likely to affect both genes. Indeed SAMS-  
140 3::mKate and GFP::SAMS-4 were reduced after either RNAi (**FigS1C**). Next, we used  
141 mass spectrometry to compare SAM levels after *sams-3* and *sams-4* RNAi and found  
142 that like *sams-1*<sup>12,21</sup>, reduction in any synthase significantly reduced but did not  
143 eliminate SAM (**Fig S1D**).

144

145 In order to compare gene expression after RNA of each SAM synthase in basal  
146 conditions, we used RNA sequencing (RNAseq). Principal component analysis showed  
147 that *sams-1*(RNAi) and *sams-5* formed distinct clusters on the first two principal  
148 components, however *sams-3* and *sams-4* were overlapping (**FigS2; Table S1: Tabs**  
149 **A-C**). About half of the genes upregulated after *sams-4* knockdown also increased in  
150 *sams-1*(RNAi) animals (**FigS3B**). To determine if genes related to distinct biological  
151 processes were present, we compared genes upregulated after *sams-1* RNAi<sup>23</sup> with

152 those changing in *sams-4* RNAi with WormCat <sup>27</sup>, which provides enrichment scores for  
153 three category levels (Cat1, Cat2, Cat3) for broad to more specific comparisons.  
154 WormCat finds that gene function categories at the Cat1 and Cat 2 level, such as  
155 METABOLISM: Lipid (**FigS2C**) or STRESS RESPONSE: Pathogen (**FigS2D-F**), are  
156 enriched at lower levels and contain different genes in *sams-4(RNAi)* animals (**Table**  
157 **S1: Tabs D-F**). Notably, *fat-7* and other lipid synthesis genes that respond to low PC in  
158 *sams-1* animals are not upregulated after *sams-4(RNAi)* (**TableS1:Tab:B**). These  
159 findings strengthen the idea that these SAM synthases could have distinct functions.

160

## 161 **Opposing roles and requirements for *sams-1* and *sams-4* in the heat shock** 162 **response**

163 In order to determine if other SAM synthases expressed in adult animals contributed to  
164 survival in heat shock, we compared the heat shock survival phenotypes of *C. elegans*  
165 with deletions in *sams-1*, *sams-3* and *sams-4* to avoid effects of co-targeting by RNAi.  
166 *sams-1(ok3033)* has a deletion covering the majority of the open reading frame and  
167 extracts from these animals lack SAMS-1 protein in immunoblots<sup>12</sup>, therefore we refer to  
168 this allele as *sams-1(lof)*. *sams-4(ok3315)* animals have a deletion that removes  
169 around a third of the open reading frame. Strikingly, *sams-4(ok3315)* mutants had the  
170 opposite phenotype from *sams-1(lof)*, and died rapidly after heat shock (**Fig1C, D,**  
171 **Table S2:Tabs B, C**). *sams-3(2932)* harbors a deletion removing most of the ORF, but  
172 in contrast to *sams-4* and *sams-1*, is indistinguishable from wild type animals in a heat  
173 shock response (**FigS3B**). Although *sams-3* may be co-targeted in RNAi experiments,  
174 we will refer solely to *sams-4* in our discussion because it has the most direct link to the



175 heat shock phenotypes. Finally, *sams-4(RNAi)* phenotypes in the heat stress response  
176 were not linked to a general failure to thrive, as *sams-4(RNAi)* animals under basal  
177 conditions had modestly enhanced lifespan (**FigS3C; Table S2: Tab A**).

178

179 Next, we used immunostaining to compare global levels of H3K4me3 in *sams-1* and  
180 *sams-4* RNAi nuclei during heat shock. In contrast to the reduction in H3K4me3 in  
181 basal conditions in *sams-1(lof)*, *sams-4(ok 3315)* or RNAi animals (**Fig1E-F, H-I**), we  
182 detected robust levels of H3K4me3 in *sams-1(lof)* nuclei after heat shock (2 hours at  
183 37°C) (**Fig1E, H**), suggesting that *sams-1*-independent mechanisms act on H3K4me3  
184 during heat shock. These increases in H3K4me3 did not appear in heat shocked *sams-*  
185 *4(RNAi)* intestinal nuclei (**Fig1F, I**), raising the possibility that *sams-4* contributed to the  
186 effects in *sams-1(lof)* animals. Next, we wanted to test effects of reducing both *sams-1*  
187 and *sams-4* levels on H3K4me3 during heat shock. Loss of multiple SAM synthases  
188 reduces viability in *C. elegans*<sup>13</sup>. In order to circumvent this, we used dietary choline to  
189 rescue PC synthesis and growth of *sams-1(RNAi)* or *(lof)* animals during development  
190<sup>12,21</sup>. *sams-1(lof); sams-4(RNAi)* animals were raised on choline until the L4 stage, then  
191 moved to normal media for 16 hours before heat shock. Immunostaining of *sams-1(lof);*  
192 *sams-4(RNAi)* intestines showed that *sams-4* is required for the H3K4me3 in heat  
193 shocked *sams-1(lof)* nuclei (**Fig1G, J**). These results were identical when we used  
194 RNAi to reduce *sams-1* in *sams-4(ok3315)* animals (**FigS3E**). We also asked if *sams-4*  
195 was necessary for the increased survival of *sams-1* animals after heat shock and found  
196 that the survival advantage in *sams-1(RNAi)* was decreased in *sams-4(ok3315)* animals  
197 (**FigS3D**). These results suggest that H3K4me3 may be remodeled during heat shock

198 with SAM from distinct synthases and that *sams-4*-dependent methylation is critical for  
199 survival. Previously, it was shown that H3K4me3 deposition is independent of *sams-4*  
200 in embryonic nuclei<sup>13</sup>, however, our finding that it is broadly decreased in *sams-4(RNAi)*  
201 intestinal nuclei suggests it may have important roles in H3K4 methylation in adults.  
202  
203 Increases in H3K4me3 have also been shown to occur in budding yeast when blocks in  
204 phospholipid synthesis relieve a drain on SAM and increase levels<sup>28</sup>, which we have  
205 confirmed in *C. elegans*<sup>23</sup>. In order to determine if SAM levels could explain differences  
206 in H3K4me3 in *sams-1* and *sams-4* animals during heat shock, we used targeted  
207 LC/MS to compare SAM, its precursor methionine and S-adenosylhomocysteine (SAH),  
208 the product after methyl transfer, before and after heat shock. As in our previous  
209 assays, SAM decreased significantly after *sams-1* or *sams-4(RNAi)* in basal conditions  
210 (**FigS3F**), whereas SAM levels increased in each population as *sams-1* or *sams-4*  
211 animals were shifted to 37°C for 2 hours (**FigS3F**). Levels of methionine and SAH also  
212 decreased when comparing control, *sams-1* or *sams-4(RNAi)* animals in basal vs heat  
213 shocked conditions (**FigS3G, H**), consistent with increased production and utilization of  
214 SAM. The increase in SAM in heat shocked animals is consistent with our data  
215 showing the contribution of SAMS-4 to H3K4me3 and survival in heat shocked *sams-1*  
216 animals, however, a reduction in demand for SAM if other metabolic processes are  
217 reduced after heat shock could also contribute. Finally, levels of SAM in heat shocked  
218 *sams-4(RNAi)* animals also rise to levels comparable to control animals at basal  
219 temperatures, however, H3K4me3 remains low in these conditions.  
220

221 **Histone methyltransferase and histone demethylation machinery have modest,**  
222 **separable effects on *sams* mutant heat shock phenotypes**

223 SAM is necessary for histone methylation; however, histone methylation dynamics are  
224 also influenced by methyltransferase (KMT) or demethylase (KDMT) activity<sup>29</sup>.  
225 Therefore, changes in histone methylation dynamics could also impact H3K4me3  
226 patterns during heat shock. H3K4me3 is catalyzed by multiple versions of the  
227 COMPASS complex, which each consist of one of several SET domain histone  
228 methyltransferases and several shared accessory subunits<sup>30</sup>. In mammals, seven  
229 methyltransferases in the SET1, MLL or THX groups can methylate H3K4. *C. elegans*  
230 contain single orthologs from two of these groups: *set-2*/SET1 and *set-16*/MLL,  
231 respectively, with roles in embryonic development<sup>31–33</sup>, lipid accumulation and  
232 transgenerational inheritance<sup>6,7</sup>. In adult *C. elegans*, *set-2* RNAi results in extensive  
233 loss of H3K4me3 in intestinal nuclei and although *set-16*(RNAi) causes an intermediate  
234 reduction in bulk H3K4me3 levels, it has a broader requirement for survival during  
235 stress<sup>23</sup>. Because specificity for H3K4 mono, di or trimethylation has not been verified  
236 on a genome-wide scale for KDMTs, we examined multiple members of the H3K4 KDM  
237 family.

238

239 In order to determine if KMTs or KDMT dynamics played a role in the change of  
240 H3K4me3 during heat shock, we used RNAi to deplete them in *sams-1*(*lof*) or *sams-*  
241 *4*(*ok3315*) animals and measured survival after heat shock and intestinal H3K4me3  
242 levels. RNAi of *set-2*/SET1 (**Fig2A**) or *set-16*/MLL (**Fig2B**) increased survival in *sams-*  
243 *1*(*lof*) animals after heat shock (also **Table S2:Tabs:C, E**) and did not limit heat shock-

244 induced H3K4me3 in *sams-1(RNAi)* nuclei (**FigS4A, B**). RNAi of two KDMTs, *rbr-2*  
245 (**Fig2C**) and *spr-5* (**Fig2D**) had opposite effects from the KMTs, moderately reducing  
246 survival (**TableS2: Tab F**), whereas *amx-1* and *lsd-1* had no effect (**FigS4G, H**;  
247 **TableS2: Tabs I, J**). RNAi of *set-2* (**Fig2E**) or *set-16* (**Fig2F**) had slight, but statistically  
248 significant effects, increasing survival of *sams-4(ok3315)* animals (**TableS2: Tabs G,**  
249 **H**). However, survival was still significantly below controls in *sams-4(ok3315)* with or  
250 without the KMT RNAi. Taken together, this suggests that *set-2* and *set-16* may act  
251 redundantly in the deposition of H3K4me3 after heat shock and are important to survival  
252 in *sams-1(lf)* animals. Furthermore, our data illustrate that the context is critical for  
253 understanding role of SAM and H3K4me3 in stress; *sams-4* and *set-16* are generally  
254 required for survival after heat shock, but loss of either H3K4 KTM enhances survival in  
255 *sams-1(lf)* animals.

256

### 257 **Distinct patterns of H3K4me3 and gene expression in *sams-1(RNAi)* versus *sams-*** 258 ***4(RNAi)* animals during heat shock**

259 H3K4me3 is a prevalent modification enriched near the transcription start sites (TSSs)  
260 of actively expressed genes<sup>34</sup>. Differing global patterns of H3K4me3 in *sams-1(RNAi)*  
261 and *sams-4(RNAi)* nuclei suggest this histone modification at specific sites could also  
262 be distinct. In order to identify loci that might link H3K4me3 to these phenotypes, we  
263 used CUT&Tag, (Cleavage Under Targets and Tagmentation, C&T)<sup>35</sup>, to determine  
264 genome-wide H3K4me3 levels in Control RNAi, *sams-1* and *sams-4(RNAi)* in basal  
265 (15°C) and after heat shock (37°C/2 hours) from two biologically independent replicates  
266 along with no antibody controls. C&T is uniquely suited to the small sample sizes

267 available from these stressed populations. In this approach, a proteinA-Tn5  
268 transposase fusion protein binds to the target antibody in native chromatin and DNA  
269 libraries corresponding to antibody binding sites are generated after transposase  
270 activation. After sequencing of libraries, we used the HOMER analysis suite<sup>36</sup> to  
271 analyze reads mapped to the *C. elegans* genome and called peaks using  
272 ChIPSeqAnno<sup>37</sup> for more detailed peak annotation. Bar plots from ChIPSeqAnno  
273 annotations and TSS plots generated with HOMER show robust mapping of H3K4me3  
274 to promoter-TSS regions, validating this approach (**Fig3A; TableS3: Tabs A-F**). While  
275 promoter-TSS regions were the largest feature in each sample, heat shocked *sams-*  
276 *4(RNAi)* animals had fewer overall peaks (**Fig3A**). Correlation plots also show strong  
277 similarity between replicates (**FigS5A**). Because C&T has not been extensively used in  
278 *C. elegans*, we compared data from basal conditions in our study to three previously  
279 published ChIP-Seq data sets<sup>38,39,40</sup>. We compared our C&T data from wild type young  
280 adult animals grown at 15°C on control RNAi food (HT115) against ModEncode (L3  
281 animals), *glp-1(e2141)* mutants from Pu et al.<sup>41</sup> and wild type adults grown at 20°C on  
282 OP50 bacteria from Wan et al.<sup>40</sup> by computing a pair-wise Pearson correlation. We  
283 found our C&T clustered most closely with the ChIPSeq from wild type animals in Wan  
284 et al., along with one of the modEncode replicates (**FigS5B**) with moderate correlation  
285 scores. Both our C&T data and the Wan ChIPseq data correlated poorly with the Pu et  
286 al. ChIP seq, which is likely due to the lack of germline nuclei in these animals. The  
287 moderate correlation between our data and ChIP seq from Wan et al may be due to  
288 differences in growth temperature and bacterial diet. As a part of our quality control, we  
289 visually inspected browser tracks around the *pcaf-1* gene, which is a long gene and has

290 been used by our labs and others as a positive control for H3K4me3 localization in the 5  
291 prime regions<sup>12,32</sup>. H3K4me3 peaks are prominent upstream of the transcript as  
292 expected and the no antibody libraries showed few reads (**FigS5C**).

293

294 Next, we compared TSS distributions and examined overlap between H3K4me3 peaks  
295 in Control RNAi animals in basal and heat shock conditions and found moderate  
296 reductions occurred with heat shock (**Fig3B**). Around 20-30% of peaks were specific to  
297 at either at basal (15°C) vs. heat shock (37°C) temperature (**Fig3C**), suggesting that  
298 H3K4me3 could be remodeled upon heat shock in *C. elegans*. TSS enrichment of  
299 H3K4me3 was sharply reduced in both *sams-1* and *sams-4* samples at 15°C, however  
300 this difference was less marked in heat shocked animals, in line with lower TSS  
301 localization in Control animals (**Fig3D, E**). While aggregate TSS enrichment for  
302 H3K4me3 was similar for *sams-1* and *sams-4* RNAi animals, this analysis could miss  
303 distinct sets of H3K4me3 marked genes in each condition. Indeed, Control, *sams-1* and  
304 *sams-4(RNAi)* animals each showed 500-1000 specific peaks in basal conditions, with  
305 moderate increases in these numbers after heat shock (**Fig3D, E**). As H3K4me3 is a  
306 widely occurring modification, we hypothesized that we might better understand  
307 potential SAM synthase-specific requirements if we focused on peaks that change in the  
308 Control RNAi heat shock response and asked how they are affected by loss of *sams-1*  
309 or *sams-4*. We used two different methods for comparing potential SAM synthase  
310 requirements for H3K4me3 in the heat shock response. First, we used differential peak  
311 calling (ChIPPeakAnno<sup>37</sup>) followed by WormCat category enrichment to determine the  
312 classes of genes which might be affected (**FigS6A-F; TableS3; Tabs G-I**). Peaks

313 present in both basal and heat shocked conditions were enriched for genes in the  
314 METABOLISM category (including Lipid: phospholipid, sphingolipid, sterol and lipid  
315 binding, along with mitochondrial genes) as well as in core function categories such as  
316 those involved in trafficking, DNA or mRNA functions (**Fig3F, FigS6D-E; Table S3:**  
317 **Tab G-I**). There was no significant category enrichment specific to 15°C animals, but  
318 after heat shock, Control RNAi animals gain enrichment in peaks at the Category 1 level  
319 in PROTEOSOME PROTEOLYSIS (**Fig3F**). This enrichment was driven by increases  
320 in H3K4me3 at E3: Fbox genes (**FigS6A, B; Table S3:Tab A,B**), which could be  
321 important for eliminating mis-folded proteins during heat shock. Comparison of peaks  
322 differentially present in *sams-1* and *sams-4* RNAi animals showed that only *sams-*  
323 *1(RNAi)* exhibited a similar enrichment to Control RNAi in the PROTEOLYSIS  
324 PROTEOSOME category (**Fig3G, FigS6C, D**), which could help explain the reduced  
325 survival of *sams-4(RNAi)* animals relative to *sams-1(RNAi)* animals. *sams-1* RNAi  
326 animals also gained enriched peaks in a wide range of gene categories within  
327 METABOLISM, whereas *sams-4(RNAi)* enriched peaks in these categories were more  
328 limited (**FigS6C-F**). Thus, loss of *sams-1* or *sams-4* differentially affects H3K4me3  
329 peaks within functional gene classes that also change in the heat shock response.  
330  
331 Next, we hypothesized that H3K4me3 at peaks in Control RNAi animals might reflect  
332 multiple differently regulated populations, some which are linked to SAM synthase  
333 function and others that are regulated at other levels. In order to test this, we divided  
334 peaks in Control animals at 15°C or 37°C into those that did not change after SAM  
335 synthase RNAi (*sams-1* or *sams-4* independent peaks) or those that were dependent on

336 *sams-1* or *sams-4* and examined aggregations around TSS regions. There was little  
337 difference between TSS plots of *sams-1* or *sams-4*-independent genes at either  
338 temperature (**Fig3H, I**). However, in basal conditions, Control peaks that depended on  
339 *sams-1* had more marked TSS localization (**Fig3J**), demonstrating that *sams-1* and  
340 *sams-4* dependent peaks have distinct TSS architectures. TSS localization was low in  
341 all 37°C samples, following the general trend of decrease after heat shock (**Fig3K**). We  
342 next separated Control peaks into those that were generally SAM synthase-dependent  
343 and those that were specific to loss of *sams-1* or *sams-4*. Aggregation of these peaks  
344 shows that peaks in Control 15°C samples that were lost only in *sams-4* RNAi also had  
345 the lowest levels of H3K4me3 in TSS regions, whereas promoters that lost this  
346 modification only after *sams-1* RNAi had higher levels of H3K4me3 (**FigS6G**). Control  
347 37°C samples exhibited a similar pattern, with a lower H3K4me3 level overall consistent  
348 with what we have observed in heat shock samples (**FigS6H**). Thus, genome wide  
349 H3K4me3 contain multiple populations with distinct TSS patterns. Peaks that are  
350 present even when *sams-1* or *sams-4* are depleted have the highest levels, whereas  
351 *sams-1*-dependent peaks have moderate H3K4me3, and peaks that are lost after *sams-*  
352 *4* RNAi have the lowest levels. Taken together, this shows that individual SAM  
353 synthases are linked to distinct sets of H3K4me3 within the genome.

354

### 355 **RNAi of *sams-1* or *sams-4* has similar effects on TSS peaks at tissue-specific** 356 **genes**

357 Our C&T and RNA seq assays were performed on whole animals. While *sams-1* and  
358 *sams-4* are co-expressed in the intestine and hypodermis, which are major stress-



359 responsive tissues, the germline nuclei contain only *sams-4* (**Fig1B** and **FigS1B**). This  
360 aligns with our previous observations that *sams-1(RNAi)* animals had normal patterns of  
361 H3K4me3 in germline nuclei (Ding, et al. 2015), whereas RNAi of *sams-4* abrogates  
362 H3K4me3 staining in germline nuclei (**FigS7A**). However, embryo production and  
363 development appear broadly normal in *sams-4* RNAi embryos (not shown). In order to  
364 determine how H3K4me3 might align with tissue-specific expression patterns, we  
365 aggregated peaks from tissue-specific RNA seq data published by Serizay, et al <sup>42</sup>.  
366 Serizay et al. separated nuclei based on tissue specific GFP expression and defined  
367 gene sets that were expressed that were ubiquitously, as well as those that were  
368 present only in a single tissue. They also performed ATAC seq (Assay for  
369 Transposase-Accessible Chromatin using sequencing). Serizay, et al. defined  
370 transcripts by expression pattern and defined sets that were specific to (*tissue\_only*), or  
371 represented in across multiple tissues (*tissue\_all*). *ubiquitous\_all* and *Germline\_only*  
372 genes had the most defined patterns of open chromatin around TSSs <sup>42</sup> We compared  
373 our C&T data with *Ubiquitous\_all*, *Germline\_only* and *Intestine\_only* genes and found  
374 that we identified peaks for around half of these genes in Control RNAi animals at 15°C  
375 or 37°C (**FigS7B-D**). We found the *ubiquitous\_all* and *germline\_only* genes also had  
376 strong H3K4me3 peaks that were reduced equally by *sams-1* or *sams-4* RNAi in both  
377 temperature conditions (**FigS7D, G; E, H**). *Intestine\_only* genes showed lower TSS  
378 enrichment but were similarly reduced after *sams-1* or *sams-4* RNAi (**FigS7H, I**). These  
379 data suggest that differences in germline expression for *sams-1* and *sams-4* are not  
380 sufficient to explain differential effects on H3K4me3 peak populations.  
381

382 **Poor expression of heat shock gene suite in *sams-4(RNAi)* animals**

383 H3K4me3 is found at the promoters of many actively transcribed genes, but it is not  
384 necessarily required for gene expression<sup>29</sup>. However, studying chromatin modification  
385 in stress responses may reveal additional regulatory effects<sup>43</sup>. We previously found  
386 using ChIP-PCR in the context of the stress response in *C. elegans* that H3K4me3  
387 increased at promoters of genes that responded to bacterial stress in a *sams-1*-  
388 dependent manner<sup>12</sup>. However, during the stress response, H3K4me3 did not change  
389 at multiple non-stress responsive genes, suggesting that stress-responsive loci might be  
390 more sensitive to SAM levels<sup>12</sup>. In order to identify genes that changed in SAM-  
391 deficient animals, we performed RNA seq, then compared genes induced by heat shock  
392 in control and *sams-1(RNAi)*<sup>23</sup> with genes induced in *sams-4(RNAi)* animals (**TableS4:**  
393 **A-C**). Upregulated genes for control and *sams-1(RNAi)* animals appeared closely  
394 grouped in principal component analysis, with *sams-4(RNAi)* upregulated genes and all  
395 downregulated gene sets forming distinct groups (**FigS8A**). We previously noted that  
396 while *sams-1(RNAi)* animals could not mount the full transcriptional response to  
397 bacterial stress, most genes activated by heat increased similarly to controls<sup>23</sup>. *sams-*  
398 *4(RNAi)* animals, in contrast, activate less than 25% of the genes induced by heat in  
399 control animals (**Fig4A**). *sams-1(RNAi)* and *sams-4(RNAi)* animals also induce more  
400 than 600 genes in response to heat that are SAM-synthase-specific and which do not  
401 increase in control animals (**Fig4A**). WormCat pathway analysis shows that *sams-*  
402 *4(RNAi)* animals lack the robust enrichment in STRESS RESPONSE (Cat1) and  
403 STRESS RESPONSE: Heat (Cat2) evidenced in both Control and *sams-1(RNAi)*  
404 samples (**Fig4B; TableS4: D-F**). In addition, enrichment of the CHAPERONE,

405 PROTEOLYSIS PROTEOSOME categories occurring in *sams-1(RNAi)* animals does  
406 not occur after *sams-4(RNAi)*, reflecting lack of induction of these genes which could be  
407 important for proteostasis in the heat shock response (**Fig4C**). Thus, reduction in  
408 *sams-1* or *sams-4* results in distinct gene expression programs in both basal conditions  
409 (**FigS2A-F**) and during the heat stress response (**Fig4A-C**). This differentiation of gene  
410 expression programs clearly shows that *sams-1* and *sams-4* have distinct functional  
411 roles.

412

413 Gene expression changes occurring after *sams-1* or *sams-4* depletion could result from  
414 direct effects on H3K4me3 or other potential methylation targets, or from indirect  
415 effects. Evaluating the impact H3K4me3 on gene expression is also complex, as this  
416 modification is generally associated but not necessary for expression of actively  
417 transcribed genes<sup>29</sup>. In our analysis of H3K4me3 peaks during the heat stress  
418 response, we found evidence of multiple peak populations that depend on or occur  
419 independently of *sams-1* or *sams-4* (**Fig2H-K, FigS6A-F**). We reasoned, therefore, that  
420 it was also critical to determine H3K4me3 levels at *sams-1*- or *sams-4*-dependent genes  
421 in the heat shock response.

422

423 First, we examined H3K4me3 peak levels at genes with increased in Control RNAi,  
424 *sams-1(RNAi)* or *sams-4(RNAi)* during heat shock. We found that genes dependent on  
425 *sams-1* or *sams-4* in the heat shock response were marked by lower overall H3K4me3  
426 levels at the TSSs (**Fig4D**). However, this analysis included large numbers of  
427 upregulated genes in *sams-1* or *sams-4* outside of the wildtype heat stress response.

428 Therefore, we next focused on genes normally upregulated during heat shock and  
429 divided them according to SAM synthase dependence. Strikingly, isolating the *sams-1*-  
430 dependent genes revealed a strong peak 5' to the TSS, which was not evident in the  
431 larger subset of Control or *sams-4(RNAi)*-dependent upregulated genes (**Fig4E, F**).  
432 Among the genes with robust peaks in heat shocked *sams-1(RNAi)* animals were two F-  
433 box proteins, *fbxa-59* and T27F6.8, which were robustly expressed in *sams-1* but not  
434 *sams-4* animals (**Fig4C, G-I**). Down regulation of T27F6.8 did not affect the survival of  
435 the animals after heat shock (**FigS8B**) while survival of animals fed *fbxa-59* RNAi was  
436 modestly affected (**FigS8C**). Survival in heat shock may be multi-genic and rely on  
437 pathway responses rather than single genes. However, our data reveals genes  
438 upregulated in the heat shock response may have different H3K4me3 levels depending  
439 on requirements for *sams-1* or *sams-4*. In addition, our results suggest that roles for  
440 H3K4me3 may become clearer when genome-wide methylation populations are  
441 separated into biologically responsive categories.

442

#### 443 **SAM synthase-specific effects on genes downregulated in the heat shock** 444 **response**

445 Transcriptional responses to heat shock largely focus on rapidly induced genes that  
446 provide protection from changes in proteostasis<sup>44,45</sup>. However, downregulated genes  
447 could also play important roles. For example, the WormCat category of  
448 TRANSMEMBRANE TRANSPORT (TM TRANS) is enriched in genes downregulated  
449 after heat shock in *C. elegans* (**Fig5A, B**). Previously we observed that heat shocked  
450 animals depended on *sams-1* for normal expression of nearly 2,000 genes, falling within

451 WormCat Categories of METABOLISM, TRANSCRIPTION FACTOR (TF),  
452 SIGNALLING and STRESS RESPONSE<sup>23</sup> (**Fig5A, B**). Interestingly, the metabolic  
453 genes dependent on *sams-1* include those in lipid metabolism, whereas the TF  
454 enrichment was centered around nuclear hormone receptors (NHRs) (**Fig5C, D**), which  
455 regulate many metabolic and stress responsive genes in *C. elegans*<sup>46</sup>. However,  
456 neither the shared TM TRANSPORT nor the *sams-1* specific categories depend on  
457 *sams-4* (**Fig5B, C**). Thus, as in genes upregulated during the heat shock response,  
458 genes downregulated in the heat shock response also have differential requirements for  
459 *sams-1* and *sams-4*.

460

461 Next, we examined H3K4me3 levels around TSSs of genes that lost expression during  
462 heat shock in Control, *sams-1* or *sams-4(RNAi)* animals. Genes decreasing in Control  
463 animals had a slight reduction of H3K4me3 peaks when comparing 15°C and 37°C  
464 samples, consistent with global levels after heat shock (**Fig5D**). RNAi of *sams-1* or  
465 *sams-4* also broadly reduced H3K4me3 TSS enrichment at downregulated genes  
466 (**Fig5D-F**). However, there were minimal differences before or after heat shock,  
467 suggesting expression patterns affecting survival could be established before induction  
468 of the stress.

469

470 H3K4me3 has been reported to act as a bookmarking modification, therefore we  
471 hypothesized that some loci could be affected before heat shock, with expression  
472 changing afterward. Therefore, we more closely examined genes with *sams-1*-  
473 dependent H3K4me3 at 15°C that lost expression during heat shock. Those genes

474 were highly enriched for METABOLISM: Lipid: beta oxidation and NHR transcription  
475 factors (**Fig6A**). We noted they included multiple members of a regulatory circuit that  
476 control expression of a beta-oxidation-like pathway that degrades toxic fatty acids  
477 identified by the Walhout lab <sup>47</sup>, including *nhr-68*, *nhr-114* and beta-oxidation genes  
478 *acdh-1*, *hach-1* *ech-6*, *-8*, and *-9* (**Fig6B, C**). Indeed, *nhr-68*, the initiating TF in this  
479 regulatory circuit, shows lower levels of H3K4me3 at its promoter in basal conditions,  
480 compared to Control or *sams-4* RNAi animals (**Fig6D**). The H3K4me3 peak overlaps  
481 with another gene, *pms-2*, whose expression does not change after heat shock or upon  
482 SAM synthase RNAi (**TableS4: Tabs A-C**). In order to test if H3K4me3-dependent  
483 regulation of *nhr-68* was important for survival during heat shock, we made use of a  
484 construct expressing *nhr-68* under the intestine-specific *ges-1* promoter<sup>47</sup>, where  
485 H3K4me3 peaks do not change after RNAi of *sams-1* or *sams-4* (**FigS9A**). Expression  
486 of *nhr-68* under this heterologous promoter had a moderate, but significant effect on  
487 survival (**Fig6E**). Thus, downregulation of *nhr-68* in *sams-1* animals after heat shock  
488 could be part of a program enhancing survival. Taken together, our results suggest  
489 differences in H3K4me3 patterns in *sams-1* and *sams-4* animals before heat shock may  
490 also influence gene expression patterns during the stress response. This demonstrates  
491 that *sams-1* and *sams-4* are required for distinct sets of genes in the heat stress  
492 response and contribute to different H3K4me3 patterns.

493

494

495

## 496 **Discussion**

497 The molecules that modify chromatin are produced by metabolic pathways <sup>48</sup>. Use of  
498 ATP, AcetylCoA or SAM for phosphorylation, acetylation or methylation of histones is  
499 tightly regulated and many studies have focused on control of enzymes or enzyme-  
500 containing complexes. Acetylation and methylation may also be regulated by  
501 metabolite levels <sup>49,50</sup>. This allows the chromatin environment to sense and respond to  
502 changes in key metabolic pathways. However, effects of methylation on chromatin are  
503 multifaceted: DNA and H3K9me<sub>3</sub> have strong repressive effects, whereas other  
504 modifications such as H3K4me<sub>3</sub> and H3K36me<sub>3</sub> are associated with active transcription  
505 <sup>29</sup>. These marks, especially H3K4me<sub>3</sub>, are most sensitive to SAM levels, most likely  
506 due to the kinetics of the H3K4me<sub>3</sub> MTs <sup>51</sup>. SAM is an abundant metabolite that  
507 contributes to multiple biosynthetic pathways in addition to acting as the major donor for  
508 histone, DNA and RNA methylation <sup>52</sup>. Reduction in SAM levels has major phenotypic  
509 consequences in animals, altering lipid levels in murine liver and *C. elegans* <sup>21,53</sup>,  
510 altering differentiation potential in iPS cells <sup>10</sup> and changing stress resistance <sup>23</sup>. In  
511 addition, 1CC has been identified as a causal regulator of aging <sup>54</sup> and is important in  
512 cancer development <sup>19,55</sup>. However, the abundance of SAM and its targets have made  
513 it difficult to connect changes in methylation to molecular pathways regulating these  
514 physiological effects. In addition, studying effects of SAM is difficult in culture because  
515 SAM itself is labile <sup>56</sup> and tissue culture media is replete with 1CC metabolites <sup>19</sup>.  
516 Important insights have been made into the impact of SAM on the breadth of H3K4me<sub>3</sub>  
517 peaks using methionine depletion <sup>9,57,58</sup>, however, this approach could affect other  
518 pathways. In this study, we have taken the approach of limiting SAM synthase

519 expression in *C. elegans*, then using genetic and molecular approaches to link  
520 methylation-dependent pathways to changes in stress responses. We found that  
521 individual SAM synthases could have distinct effects even on a single methylation target  
522 such as H3K4me3. This observation not only shows that examining how SAM is  
523 produced within the cells allows differentiation of phenotypic effects, but also supports  
524 the striking notion of ‘where’ SAM comes from affects its functional output. While  
525 mammalian cells express either one of two SAM synthases, MAT2A, which is present in  
526 non-liver cells, may be present in multiple regulatory isoforms<sup>59</sup>. Thus, the isoform-  
527 specific production and functional targets for SAM synthases we uncover could also be  
528 important in mammals. Hints of this exist in other cellular systems – 1CC enzymes, for  
529 example, have been associated with chromatin modifying complex in yeast<sup>14</sup> and  
530 mammalian cells<sup>60</sup>.

531  
532 H3K4me3 is clearly an important link between SAM levels, aging and stress  
533 phenotypes, as loss or reduction of H3K4 MT function phenocopy aspects of SAM  
534 depletion<sup>12,23</sup>. However, this modification is also wide-spread, and transcription may  
535 occur even when this mark is not present<sup>61</sup>. By studying acute changes in gene  
536 expression during heat stress response in *C. elegans*, we have found that H3K4me3  
537 populations can also be separated based on SAM synthase requirements. The  
538 importance of H3K4me3 during heat shock is also reflected in the interactions between  
539 the SAM synthases and the KMTs/KDMTs as lowering levels of *set-2* or *set-16* increase  
540 survival. This suggests that the context of low SAM from SAMS-1, reducing H3K4me3



541 can have additional benefits. Future studies identifying genomic targets of H3K4me3  
542 KMTs together with SAM synthases may be important for untangling these effects.  
543  
544 SAM synthase-specific effects may also vary according to the biological context, as loss  
545 of *sams-1* improves the ability of *C. elegans* to survive heat stress, while limiting its  
546 ability to withstand bacterial pathogens<sup>23</sup>. Our previous studies showed that the  
547 induction of bacterial pathogen induced genes was limited in the absence of *sams-1*,  
548 however, in this study, we find links between *sams-1*-dependent genes in basal  
549 conditions and effects on survival after heat shock. Thus, the altered methylation  
550 landscape in *sams-1* animals provides a context favorable to extended lifespan and  
551 survival in heat stress but which limits other stress responsive genes. This context may  
552 depend on systems level effects and not on a single “target” gene, as our analysis of  
553 genes that lose peaks in *sams-1* or *sams-4(RNAi)* animals have modest effects, but do  
554 not recapitulate the entire phenotype. It is also possible that there are genes or specific  
555 modules that drive enhanced survival in *sams-1* animal or responsible for viability after  
556 loss of *sams-4(RNAi)*. Our approach dividing peaks into groups based on  
557 responsiveness to *sams-1* or *sams-4* demonstrates the importance of identifying  
558 specific populations of H3K4me3; combining *set-2* or *set-16* sensitive loci may provide  
559 the resolution to identify these loci in future studies. Manipulation of the 1CC is of  
560 interest as a modulator of aging<sup>54</sup> and affects multiple biological processes. Our studies  
561 demonstrate that lowering SAM, or reducing levels of a key methylation target such as  
562 H3K4me3, does not represent a single biological state and that it is important to  
563 consider that effects may depend on synthase-specific regulation or context. Future

564 identification of these regulators will provide the mechanistic details key to  
565 understanding the role of the 1CC in aging and stress.

566

567 **Limitations:**

568 The genetic tools used in our study provide a method to reduce SAM from a specific  
569 enzymatic source. However, the roles for SAM in the cell are broad and can affect  
570 methylation of multiple targets. While our metabolomics assays show that SAM  
571 increases in heat shocked *sams-1(RNAi)* animals, we have not demonstrated that this  
572 SAM is derived from *sams-4*. In addition, survival benefits after heat shock occur  
573 across broad cellular functions including proteostasis and other methylation marks such  
574 as H3K9me3<sup>62</sup>. Thus, there may be multiple additional methylation-dependent  
575 mechanisms that influence survival of *sams-1* or *sams-4* animals during heat shock. In  
576 addition, we measured gene expression and H3K4me3 at two hours post heat shock,  
577 whereas the survival assay occurs over multiple days. Thus, there may be changes in  
578 gene expression or histone modifications occurring at later times that also affect  
579 survival.

580

581 **Materials and methods**

582 ***C. elegans* strains**

583 N2(Caenorhabditis Genetics Center); *sams-1(lof)(ok3033)*; *sams-3(ok2932) IV*, *sams-*  
584 *4(ok3315) IV*, Caenorhabditis Genetics Center), tagRFP::SAMS-1 (WAL500, this  
585 study); GFP::SAM-4(WALK501, this study); SAMS-1::RFP;GFP::SAMS-4(WAL502, this  
586 study), SAMS-3::mKate (WAL305). *Pges-1::NHR-68::GFP* (VL1296)<sup>47</sup>. CRISPR  
587 tagging for WAL500 and WAL501 were done by the UMASS Medical School transgenic  
588 core, confirmed by PCR for genotype and outcrossed three times to wild type animals.  
589 Next, each strain was crossed to the respective deletion allele to create WAL503  
590 (RFP::*sams-1(ker5)*; *sams-1(ok3033)*) and WAL504(GFP::*sams-4(ker6)*; *sams-*  
591 *4(ok3315)*). *sams-3::mKate(nu3139)* (COP2476) was constructed using CRISPR by In  
592 Vivo biosystems then outcrossed 3 times (WAL305).

593

594 ***C. elegans* culture, RNAi and stress applications.**

595 *C. elegans* (N2) were cultured using standard laboratory conditions on *E. coli* OP50 or  
596 HT115 expressing appropriate RNAi. RNAi expression was induced using 6 mM IPTG.  
597 Adults were bleached onto RNAi plates and allowed to develop to the L4 to young adult  
598 transition before stresses were applied. For heat stress applications, animals were  
599 raised at 15°C from hatching then at the L4/young adult transition replicate plates were  
600 placed at 15°C or 37°C for 2 hours. After each stress, animals were washed off the  
601 plates with S-basal, then pellets frozen at -80°C. RNA was prepared as in<sup>12</sup>. For  
602 survival assays, ~10 -15 adult N2 animals were bleached on 60 mm RNAi plates. The  
603 eggs were allowed to hatch and grow to young adults at 15°C. 25-30 young adults were

604 then moved to 35 mm plates in triplicate (75-90 animals per RNAi treatment) and  
605 subjected to heat shock at 37°C for 2 hours. Animals were kept at 20°C for the  
606 remainder of the assay. Dead animals were identified by gentle prodding, were counted  
607 and removed each day. Animals that died of bagging or from desiccation on the side of  
608 the plate were not counted. Three independent non blinded biological replicates were  
609 carried out and Kaplan-Meier curves were generated with GraphPad Prism v8.0. For  
610 lifespan experiments, the N2 adults were bleached on 60 mm RNAi plates. The eggs  
611 were allowed to hatch and grow to young adults at 20°C. 25-30 young adults were then  
612 moved to 35 mm plates in triplicate (75-90 animals per RNAi treatment). Adults were  
613 moved to fresh plates every day and dead animals were identified by gentle prodding  
614 and removed each day. Three independent non blinded biological replicates were  
615 carried out and Kaplan-Meier curves were generated with GraphPad Prism v8.0.

616

### 617 **Gene expression analysis, RNA sequencing and analysis**

618 RNA for deep sequencing was purified by Qiagen RNeasy. Duplicate samples were  
619 sent for library construction and sequencing at BGI (China). Raw sequencing reads  
620 were processed using an in-house RNA-Seq data processing software Dolphin at  
621 University of Massachusetts Medical School<sup>63</sup>. The raw read pairs were first aligned to  
622 *C. elegans* reference genome with ws245 annotation. The RSEM method was used to  
623 quantify the expression levels of genes and Deseq was used to produce differentially  
624 expressed gene sets with more than a 2-fold difference in gene expression, with  
625 replicates being within 0.05 in a Students T test and a False Discovery Rate (FDR)  
626 under 0.01. Statistics were calculated with DeBrowser<sup>64</sup>. Venn Diagrams were

627 constructed by BioVenn<sup>65</sup>. WormCat analysis was performed using the website  
628 [www.wormcat.com](http://www.wormcat.com)<sup>27,66</sup> and the whole genome annotation version 2 (v2) and indicated  
629 gene sets. PCA was conducted by using *prcomp* in R and graphed with *ggplot* in R  
630 studio.

631

### 632 **Immunofluorescence**

633 For H3K4me3 (Cell Signaling Technology, catalogue number C42D8) staining,  
634 dissected intestines were incubated in 2% paraformaldehyde, freeze cracked, then  
635 treated with -20°C ethanol before washing in PBS, 1% Tween-20, and 0.1% BSA.  
636 Images were taken on a Leica SPE II at identical gain settings within experimental sets.  
637 Quantitation was derived for pixel intensity over nuclear area for at least seven  
638 dissected intestines, with at least 3 nuclei per intestine. Three biological repeats were  
639 carried out for every experiment.

640

### 641 **Sample preparation for LC-MS**

642 *C. elegans* (N2) gravid adults (~15-20) were bleached onto 60 mm RNAi plates, eggs  
643 were allowed to hatch and grow to young adults at 15°C. For heat stress application,  
644 replicate plates were placed at either 15°C or 37°C for 2 hours. At the end of the heat  
645 stress, worms were collected in S-Basal, and pellets were frozen at -80°C. Four  
646 independent biological replicates were collected. To prepare the samples for LC-MS,  
647 the pellet was thawed on ice and washed with 0.9% NaCl. Washed worms were then  
648 transferred to 2 mL FASTPREP tubes (MP Biomedicals) containing 1.4 mm ceramic  
649 beads (Qiagen). The samples were then resuspended in 1 mL 80% methanol (LC-MS

650 grade) and homogenized using a bead beater (6.5 m/s; 20 seconds). The samples were  
651 cooled on ice between cycles. The homogenized samples were then vortexed at 4°C for  
652 10 min and centrifuged at 21,000 RPM for 10 min at 4°C. The supernatant was removed  
653 at dried under vacuum. The pellet was resuspended in ice cold RIPA buffer and  
654 vortexed at 4°C for 10 min and centrifuged at 21,000 RPM at 4°C for 10 min. The  
655 supernatant was removed and used for protein quantification using Pierce Protein BCA  
656 assay kit (ThermoFisher). The protein quantification was then used to resuspend the  
657 pellet for an equal input of 0.5 µg/ml of protein per sample.

## 658 **LC-MS analysis**

### 659 **Absolute quantification of SAM:**

660 Samples were extracted in 80% methanol containing 500 nM methionine-<sup>13</sup>C<sub>5</sub>-<sup>15</sup>N  
661 (Cambridge Isotope Laboratories, Inc.) as an internal standard and metabolites were  
662 detected as described above. Absolute quantification of SAM was performed using an  
663 external calibration curve prepared with synthetic standard, and peak areas were  
664 normalized to methionine-<sup>13</sup>C<sub>5</sub>-<sup>15</sup>N. Normalized peak areas from the standard curve  
665 were fit to a quadratic log-log equation with an r<sup>2</sup> value of >0.995 which was then used  
666 to calculate the concentration of SAM in each sample. Statistical analysis was carried  
667 out for the data using GraphPad Prism (v8.0).

668

### 669 **Relative metabolite profiling**

670 Metabolomics was conducted on a QExactive Plus bench top orbitrap mass  
671 spectrometer equipped with an Ion Max source and a HESI II probe, which was coupled  
672 to a Vanquish Horizon HPLC system (Thermo Fisher Scientific, San Jose, CA). External

673 mass calibration was performed using the standard calibration mixture every 7 days.  
674 Dried extracts were reconstituted in enough water to achieve a final concentration of 0.5  
675  $\mu\text{g/ml}$  protein per sample. 2  $\mu\text{L}$  of this resuspended sample were injected onto a  
676 SeQuant® ZIC®-pHILIC 150 x 2.1 mm analytical column equipped with a 2.1 x 20 mm  
677 guard column (both 5 mm particle size; Millipore Sigma). Buffer A was 20 mM  
678 ammonium carbonate, 0.1% ammonium hydroxide; Buffer B was acetonitrile. The  
679 autosampler tray was held at 4°C. The chromatographic gradient was run at a flow rate  
680 of 0.150 mL/min as follows: 0-20 min: linear gradient from 80-20% B; 20-20.5 min: linear  
681 gradient from 20-80% B; 20.5-28 min: hold at 80% B. The mass spectrometer was  
682 operated in full-scan, polarity-switching mode, with the spray voltage set to 4.0 kV, the  
683 heated capillary held at 320°C, and the HESI probe held at 350°C. The sheath gas flow  
684 was set to 10 units, the auxiliary gas flow was set to 1 units, and the sweep gas flow  
685 was set to 1 unit. MS data acquisition was performed in a range of  $m/z = 70\text{--}1000$ , with  
686 the resolution set at 70,000, the AGC target at  $1 \times 10^6$ , and the maximum injection time at  
687 20 msec. An additional scan ( $m/z$  220-700) in negative mode only was included to  
688 enhance detection of nucleotides. Relative quantitation of polar metabolites was  
689 performed TraceFinder 5.1 (Thermo Fisher Scientific) using a 5 ppm mass tolerance  
690 and referencing an in-house library of chemical standards. Statistical analysis was  
691 carried out for the data using GraphPad Prism (v8.0).

692

### 693 **CUT&Tag**

694 *C. elegans* (N2) were cultured using standard laboratory conditions on *E. coli* OP50.

695 Adults were bleached onto RNAi plates and allowed to develop to the L4 to young adult

696 transition before heat stress was applied. For heat stress applications, animals were  
697 raised at 15°C from hatching then at the L4/young adult transition replicate plates were  
698 placed at 15°C or 37°C for 2 hours. At the end of the heat stress, animals were washed  
699 off the plates with S-basal, then pellets frozen at -80°C. Worm pellets were washed with  
700 S-Basal to remove bacteria, then resuspended in 750  $\mu$ L of chilled Nuclei Purification  
701 Buffer (50 mM HEPES pH = 7.5, 40 mM NaCl, 90 mM KCl, 2 mM EDTA, 0.5 mM EGTA,  
702 0.2 mM DTT, 0.5 mM PMSF, 0.5 mM spermidine, 0.1% tween 20, and cComplete  
703 proteinase inhibitor cocktail (Roche)). The suspension was then transferred to Potter-  
704 Elvehjem Tissue Grinder (3 mL). The worms were ground with 2-3 cycles consisting of  
705 ~45-50 strokes of the grinder. The samples were chilled on ice for ~5 minutes between  
706 consecutive cycles. The lysates were passed through 100 micron filter (X3) followed by  
707 40 micron (X3) (Pluriselect). The lysates were then centrifuged at 4500 RPM for 10  
708 minutes at 4°C. The pellets were resuspended gently in wash buffer (1M HEPES pH  
709 7.5, 5 M NaCl, 2 M spermidine). Concanavalin bead slurry (10  $\mu$ L/sample) was added  
710 gently to the samples and allowed to incubate at room temperature for 15 min in an  
711 end-over-end rotator. The sample tubes were then transferred to a magnetic stand and  
712 liquid was gently removed. The nuclei were gently resuspended in 50  $\mu$ L of chilled  
713 antibody buffer (8  $\mu$ L 0.5 M EDTA, 6.7  $\mu$ L 30% BSA in 2 mL Dig-wash buffer (400  $\mu$ L  
714 5% digitonin with 40 mL Wash buffer)). 1  $\mu$ L anti-H3K4me3 antibody (Cell Signaling  
715 Technology, catalogue number C42D8) was added to the suspension and allowed to  
716 bind overnight at 4°C on a nutator shaker. Samples without any antibody added were  
717 used as controls to correct for background reads and further processed per the  
718 CUT&Tag protocol <sup>67</sup> to generate sequencing libraries. The libraries were amplified by



719 mixing 21  $\mu$ L of DNA with 2 $\mu$ L each of (10  $\mu$ M) barcoded i5 and i7 primers, using a  
720 different combination for each sample. 25  $\mu$ L NEBNext HiFi 2  $\times$  PCR Master mix (NEB)  
721 was added, and PCR was performed using the following cycling conditions: 72  $^{\circ}$ C for  
722 5 minutes (gap filling); 98  $^{\circ}$ C for 30 seconds; 17 cycles of 98  $^{\circ}$ C for 10 seconds and  
723 63  $^{\circ}$ C for 30 s; final extension at 72  $^{\circ}$ C for 1 minute and hold at 4  $^{\circ}$ C. 1.1  $\times$  volume of  
724 Ampure XP beads (Beckman Coulter) was incubated with libraries for 10 minutes at  
725 room temperature to clean up the PCR mix. Bead bound DNA was purified by washing  
726 twice with 80% ethanol and eluting in 20  $\mu$ L 10 mM Tris pH 8.0. Size distribution of the  
727 libraries was determined by Fragment analyzer and concentration by the KAPA Library  
728 Quantification Kit before sequencing to determine the H3K4me3 landscape in basal and  
729 heat stress condition in worms fed on control, *sams-1* or *sams-4* RNAi. Sequencing of  
730 the prepared libraries was carried out on Illumina NextSeq 500.

731

### 732 **Data analysis**

733 Paired end reads from each sample were aligned to the *C. elegans* genome (ce11 with  
734 ws245 annotations) using Bowtie2<sup>68</sup> with the parameters -N 1 and -X 2000. Duplicate  
735 reads were removed using Picard (<http://broadinstitute.github.io/picard/>) and the reads  
736 with low quality scores (MAPQ < 10) were removed. HOMER software suite was used  
737 to process the remaining mapped reads<sup>36</sup>. The “makeUCSCfile” command was used  
738 for generating genome browser tracks. Data was normalized to library size. the  
739 “findPeaks <tag directory> -style histone -o auto” command was used for calling  
740 H3K4me3 peaks and the “annotatePeaks” command was used for making aggregation  
741 plots. Differential peak calling was accomplished using<sup>37</sup>the command “. We used the

742 findOverlapsOfPeaks command in ChipSeqAnno<sup>37</sup> with a max gap of 1000 basepairs to  
743 determine peak overlap. TSS plots were generated using HOMER<sup>36</sup> and Venn  
744 Diagrams were constructed by BioVenn<sup>65</sup>.

745

746 Correlation matrices were generated with deeptools version 3.5.1<sup>69</sup>. Multibamsummary  
747 was used to compare bam files from each sample, using default values except --binSize  
748 2000. This data was visualized using plotCorrelation with --removeOutliers and the  
749 Pearson method. Previously published datasets were used to compare H3K4me3 Cut  
750 and Tag versus previously published data sets. Young adults fed a normal diet were  
751 used from Wan et al. 2022<sup>40</sup>. Day 2 *glp-1* adults were chosen from Pu et al<sup>39</sup>.  
752 modENCODE ChIP-seq data drew from L3 animals<sup>38</sup>.

753

754

755

756

757

758 **Acknowledgements**

759 We would like to acknowledge the Walker lab for reading of the manuscript, Drs. Marian

760 Walhout and Craig Peterson for helpful discussions and Life Science editors for

761 manuscript assistance. Absolute quantification of SAM was carried out at the

762 Whitehead Metabolomics Core (Cambridge, MA). We thank the UMASS Transgenic

763 animal core (Dr. Paola Perrat and Dr. Michael Francis) for construction of RFP::SAMS-

764 1and GFP::SAMS-4. Funding is from NIH: 1R01AG053355 to AKW and R01HD072122

765 to TGF.

766

767 **Figure legends**

768 **Figure 1 *sams-1*-independent acquisition of H3K4me3 in heat shocked animals**

769 **(A)** Methionine intake through diet enters the 1 carbon cycle and is used by SAM

770 synthases for the synthesis of SAM which is used by methyltransferases to add methyl

771 moieties to proteins, nucleic acids and lipids. **(B)** Representative confocal images of

772 animals co-expressing RFP::*SAMS-1* and GFP::*SAMS-4* in the germline and intestine.

773 Kaplan-Meier survival plots of *sams-1(lof)* **(C)** or *sams-4(ok3315)* **(D)** following heat

774 shock. Statistical significance is shown by Log-rank test. Each graph represents the

775 compiled data from 3 biologically independent repeats; data is compiled in Table S2.

776 Representative immunofluorescence images of intestinal nuclei stained with H3K4me3-

777 specific antibody and quantification in *sams-1(lof)* animals **(E, H)**, *sams-4(RNAi)* **(F, I)** or

778 in *sams-1(lof); sams-4(RNAi)* animals **(G, J)**. *sams-3* may also be targeted; see also

779 **Figure S3E**). Statistical significance was calculated using unpaired Student's t-test. ns=

780 not significant, \*\*\*\* =  $p < 0.0001$ , \*\*\* =  $p < 0.001$ . Graph represents compiled data from

781 three biologically independent repeats per condition.

782

783 **Figure 2: H3K4me3 demethylases modulate SAM synthase phenotypes**

784

785 Kaplan-Meier plots of survival assays comparing basal and heat shocked wild type (N2)

786 or *sams-1(lof)* animals grown on RNAi for the histone methyltransferases *set-2* **(A)** and

787 *set-16* **(B)**, or demethylases *rbr-2* **(C)** and *spr-5* **(D)**. Heat shock survival assays for

788 *sams-4(ok3315)* animals exposed to *set-2* or *set-16* RNAi are shown in **E, F**. Statistical

789 significance is shown by Log-rank test. Each graph represents compiled data from 3

790 biologically independent repeats. Data for each replicate is compiled in Table S2.

791  
792 **Figure 3 H3K4me3 modifying enzymes modulate SAM synthase phenotypes**  
793 **(A)** Bar graph showing the distribution of the enrichment of H3K4me3 over different  
794 genomic loci in animals fed control RNAi, *sams-1(RNAi)* or *sams-4(RNAi)* at 15°C and  
795 37°C. **(B)** Aggregation plots showing TSS enrichment in the H3K4me3 peaks identified  
796 in animals fed control RNAi at 15°C and 37°C. The Y axis on TSS plots shows Peaks  
797 per base pair of gene. **(C)** Venn diagram comparing the overlap in the H3K4me3  
798 peaks identified in animals fed control RNAi at 15°C and 37°C. **(D)** Aggregation plots  
799 showing TSS enrichment in the H3K4me3 peaks identified in animals fed control RNAi  
800 or *sams-1(RNAi)* or *sams-4(RNAi)* at 15°C and Venn diagram comparing the overlap in  
801 the H3K4me3 peaks identified in animals fed control RNAi or *sams-1(RNAi)* or *sams-*  
802 *4(RNAi)* at 15°C. **(E)** Aggregation plots showing TSS enrichment in the H3K4me3 peaks  
803 identified in animals fed control RNAi or *sams-1(RNAi)* or *sams-4(RNAi)* at 15°C and  
804 Venn diagram comparing the overlap in the H3K4me3 peaks identified in animals fed  
805 control RNAi or *sams-1(RNAi)* or *sams-4(RNAi)* at 37°C. **(F)** Bubble chart showing  
806 enriched gene categories in differential peaks as determined by WormCat in animals  
807 fed control RNAi at 15°C only, 37°C only and common between 15°C and 37°C **(G)** or  
808 *sams-1(RNAi)* and *sams-4(RNAi)* at 37°C. Aggregation plots showing TSS enrichment  
809 of Control peaks that did not change after *sams-1(RNAi)* and *sams-4(RNAi)*  
810 (independent) **(H)** 15°C or **(I)** 37°C. Shaded areas in the Venn diagrams indicate the  
811 population of genes used for plotting the TSS enrichment plots. Aggregation plots  
812 showing TSS enrichment of Control peaks that were dependent on *sams-1(RNAi)* or

813 *sams-4(RNAi)* (**J**) 15°C or (**K**) 37°C. Shaded areas in the Venn diagrams indicate the  
814 population of genes used for plotting the TSS enrichment plots.

815

816 **Figure 4 Distinct gene expression and H3K4me3 patterns after heat shock in**  
817 ***sams-1* and *sams-4* RNAi animals**

818 **(A)** Venn diagram showing overlap of genes upregulated by heat shock in control,  
819 *sams-1* or *sams-4* RNAi animals. *sams-1* data is from Ding, et al. 2018. **(B)** Bubble  
820 charts show broad category enrichment of up genes determined by Worm-Cat in control  
821 (RNAi) or *sams-1* or *sams-4* animals in genes changed (FDR<0.01) after heat shock.  
822 **(C)** Heat map for heat shock response genes up regulated following heat shock in  
823 animals fed control RNAi, *sams-1* or *sams-4(RNAi)*. TSS plots showing aggregation of  
824 H3K4me3 in genes upregulated in control, *sams-1* or *sams-4* RNAi at **(D)** 15°C or **(E)**  
825 37°C. TSS plots showing aggregation of H3K4me3 in all genes upregulated in control or  
826 *sams-1* dependent or *sams-4* RNAi dependent at **(F)** 15°C or **(G)** 37°C. The Y axis on  
827 TSS plots shows Peaks per base pair of gene. Genome browser tracks for **(H)** *fbxa-59*  
828 and **(I)** *T27F6.8* to visualize changes in H3K4me3 enrichment in animals fed control,  
829 *sams-1* or *sams-4(RNAi)* at 15°C or 37°C.

830

831 **Figure 5 Genes that depend on *sams-1* or *sams-4* for expression have reduced**  
832 **H3K4me3**

833 **(A)** Venn diagram showing overlap in down regulated genes in animals fed control,  
834 *sams-1* or *sams-4(RNAi)* at 37°C. **(B)** Bubble charts show broad category enrichment of  
835 metabolism genes determined by Worm-Cat in *sams-1* or *sams-4* animals in genes

836 changed (FDR<0.01) after heat shock. **(C)** Bubble charts show broad category  
837 enrichment of transcription factor and metabolism genes determined by Worm-Cat in  
838 *sams-1* or *sams-4* animals in genes changed (FDR<0.01) after heat shock. Aggregation  
839 plots showing average enrichment of reads around the transcription start site (TSS) in  
840 animals fed **(D)** control, **(E)** *sams-1* or **(F)** *sams-4(RNAi)* at 15°C or 37°C. The Y axis on  
841 TSS plots shows Peaks per base pair of gene.

842

843 **Figure 6 *nhr* and lipid beta oxidation genes lose H3K4me3 after *sams-1* RNAi but**  
844 **expression after heat shock**

845 **(A)** Venn diagram showing the overlap between H3K4me3 peaks identified in animals  
846 fed control or *sams-1(RNAi)* at 15°C and down regulated genes identified in heat  
847 shocked animals fed *sams-1(RNAi)*. Heat map for **(B)** nuclear hormone response genes  
848 and **(C)** lipid  $\beta$ -oxidation genes down regulated following heat shock in animals fed  
849 control RNAi, *sams-1* or *sams-4(RNAi)*. Genes linked to *nhr-68* feedback loop<sup>47</sup> are  
850 marked in red. **(D)** Genome browser tracks for *nhr-68* to visualize changes in H3K4me3  
851 enrichment in animals fed control, *sams-1* or *sams-4(RNAi)* at 15°C or 37°C.

852

853

854 **Supplemental data**

855 **Fig S1: Expression patterns of SAM synthases in adult *C. elegans***

856 **(A)** Comparison of polyA+ RNA levels of SAM synthases with selected other metabolic  
857 genes in adult animals from the modEncode data set<sup>24</sup>. **(B)** Representative confocal  
858 images of animals expressing RFP::*SAMS-1* or GFP::*SAMS-4*. hypodermis is (h),

859 intestine (i) and germline (gl). **(C)** Confocal projections of GFP::SAMS-4 and SAMS-  
860 3::mKate subjected to *sams-3* or *sams-4(RNAi)*. **(D)** Absolute quantification of the SAM  
861 level in animals fed on control RNAi or *sams-4(RNAi)*. The levels are expressed as  
862 mM/mg tissue.

863

864 **Figure S2: Distinct patterns of gene expression after *sams-1* or *sams-4* RNAi in**  
865 **basal conditions**

866 **(A)** Principal component analysis showing overlapping components between genes  
867 regulated in *sams-3* and *sams-4(RNAi)* animals. **(B)** Venn diagram showing the overlap  
868 in up regulated genes in animals fed *sams-1* or *sams-4(RNAi)*. **(C)** Bubble charts show  
869 broad category enrichment of up regulated genes in animals fed *sams-1* or *sams-*  
870 *4(RNAi)*. **(D)** Bubble charts show broad category enrichment of down regulated genes in  
871 animals fed *sams-1* or *sams-4(RNAi)*. **(E)** Venn diagram showing the overlap in up  
872 regulated genes involved in lipid metabolism in animals fed *sams-1* or *sams-4(RNAi)*.  
873 **(F)** Venn diagram showing the overlap in up regulated genes involved in pathogen  
874 stress response in animals fed *sams-1* or *sams-4(RNAi)*.

875

876 **Fig S3: *sams-4* is important for survival and H3K4me3 in *sams-1* animals after**  
877 **heat shock.**

878 **(A)** Schematic for the heat stress assay. **(B)** Survival assays comparing response to  
879 heat in SAM synthase mutants. **(C)** Lifespan assay with *sams-4(RNAi)* animals where  
880 *sams-3* may also be targeted. **(D)** Heat shock survival assays showing that genetic loss  
881 of *sams-4* limits survival in *sams-1(RNAi)* animals after heat shock. For B-D, statistical



882 significance is shown by Log-rank test. Each graph represents compiled data from 3  
883 biologically independent repeats. Data for each replicate is compiled in Table S2. **(E)**  
884 Quantification of immunofluorescence imaging of intestinal nuclei stained with H3K4me3  
885 antibody after heat shock from *sams-4(ok3315); sams-1(RNAi)* animals. Statistical  
886 significance was calculated using unpaired Student's t-test. ns= not significant, \*\*\*\* =  
887  $p < 0.0001$ , \*\*\* =  $p < 0.001$ . Graph represents compiled data from three biologically  
888 independent repeats per condition. LC/MS relative quantitation of SAM **(F)**, Methionine  
889 **(G)** and S-adenosylhomocysteine (SAH) **(H)**. Graphs represent 4 independent  
890 biological replicates (1-4: red, blue, orange and green) that were normalized for protein  
891 levels before quantitating relative levels of metabolites.

892

#### 893 **Figure S4: H3K4me3 demethylases modulate SAM synthase phenotypes**

894 Representative immunofluorescence images and quantitation of intestinal nuclei stained  
895 with H3K4me3 specific antibody for *set-2* **(A, D)**, *set-16* **(B, E)** and *rbr-2* **(C, F)**.  
896 Statistical significance was calculated using unpaired Student's t-test. ns= not  
897 significant, \*\*\*\* =  $p < 0.0001$ , \*\*\* =  $p < 0.001$ . Graph represents compiled data from three  
898 biologically independent repeats per condition. Heat shock survival assays examining  
899 the impact of demethylase knockdown on *sams-1(lof)* animals for *amx-1* **(G)** and *Isd-1*  
900 **(H)**. Survival was determined by plotting Kaplan-Meier survival plots. Statistical  
901 significance is shown by Log-rank test. Each assay represents compiled data from 3  
902 biologically independent repeats **(Table S2)**.

903

#### 904 **Figure S5: H3K4me3 C&T correlation with published H3K4me3 ChipSeq data.**

905 (A) Correlation plots showing r values for C&T replicates. (B) Comparison of  
906 H3K4me3ChIP seq from modEncode (L3)<sup>38</sup>, Pu et al (Adult *glp-1(e2141)*)<sup>41</sup>, Wan et al  
907 (adult)<sup>40</sup> and our C&T data. (C) IGV browser tracks showing no antibody controls  
908 around the *pcaf-1* gene, which has been used as positive control for H3K4me3 5 prime  
909 peaks in *C. elegans*<sup>12,32</sup>.

910

911 **Figure S6. Distinct gene expression and H3K4me3 patterns after heat shock in**  
912 ***sams-1* and *sams-4* RNAi animals**

913 Sunburst diagram showing the enriched gene categories in animals fed control RNAi at  
914 (A) 15°C or (B) 37°C. Sunburst diagram showing the overall enriched gene categories  
915 (C) and genes involved in metabolism (D) in animals fed *sams-1(RNAi)* at 37°C.  
916 Sunburst diagram showing the overall enriched gene categories (E) and genes involved  
917 in metabolism (F) in animals fed *sams-4(RNAi)* at 37°C. Aggregation plots showing  
918 average enrichment of reads around the transcription start site (TSS) for genes which  
919 are *sams-1* dependent only dependent on either *sams-1* or *sams-4* or *sams-4*  
920 dependent only at (G) 15°C or (H) 37°C. The Y axis on TSS plots shows Peaks per  
921 base pair of gene.

922

923 **Fig S7. SAM synthase-specific patterns H3K4me3 in germline nuclei.**

924 (A) Representative immunofluorescence images of H3K4me3 staining in the germline  
925 in animals fed on control, *sams-1* or *sams-4(RNAi)*. (B) Venn diagrams showing the  
926 overlap in H3K4me3 peaks identified on ubiquitously expressed genes in control  
927 animals at 15°C or 37°C. (C) Venn diagrams showing the overlap in H3K4me3 peaks

928 identified on germline specific genes in control animals at 15°C or 37°C. Aggregation  
929 plots showing average enrichment of reads around the transcription start site (TSS) of  
930 **(D)** ubiquitously or **(E)** germline specific or **(F)** intestine specific genes in animals fed  
931 control, *sams-1* or *sams-4(RNAi)* at 15°C. The Y axis on TSS plots shows Peaks per  
932 base pair of gene. Aggregation plots showing average enrichment of reads around the  
933 transcription start site (TSS) of **(G)** ubiquitously or **(H)** germline specific or **(I)** intestine  
934 specific genes in animals fed control, *sams-1* or *sams-4(RNAi)* at 37°C.

935

936 **Figure S8: *sams-1* and *sams-4* have distinct gene expression patterns after heat**  
937 **shock.**

938 **(A)** PCA plot showing groupings of up and down regulated genes from Control, *sams-1*  
939 or *sams-4(RNAi)* animals. Survival curves examining heat shock responses after RNAi  
940 of T27F6.8 or *fbxa-59*. Survival was determined by plotting Kaplan-Meier survival plots.  
941 Statistical significance is shown by Log-rank test. Each assay represents compiled data  
942 from 3 biologically independent repeats (**Table S2**).

943

944 **Figure S9: Schematic of potential *nhr-68* module regulation in *sams-1* animals.**

945 **(A)** Genome browser tracks for *ges-1* showing H3K4me3 enrichment in animals fed  
946 control, *sams-1* or *sams-4(RNAi)* at 15°C or 37°C. **(B)** Schematic showing the dynamic  
947 changes in the transcription and H3K4me3 landscape in low SAM animals following  
948 heat shock.

949

950 **Table S1 (Microsoft Excel File): RNA seq for SAM synthase knockdown in basal**  
951 **conditions. Tabs A-C** show *sams-3*, *sams-4*, *sams-5* (RNAi) RNA seq data then **Tabs**  
952 **D-F** show WormCat gene enrichment. *sams-1* data is from Ding, et al. 2018. Enriched  
953 categories from WormCat. Red color denoted categories with a p value of less than  
954 0.01. NS is not significant, NV is no value, RGS is regulated gene set.

955

956 **Table S2 (Microsoft Excel File) Statistics for survival curves.** Each tab contains  
957 data for replicate experiments (R1, R2, R3). Statistical information from GraphPad  
958 Prism is also included.

959

960 **Table S3 (Microsoft Excel File). Tabs A-F:** Cut and Tag peaks from Control, *sams-1*  
961 and *sams-4* RNAi animals at 15 and 37 degrees determined by HOMER. **Tabs G-I:**  
962 Enriched categories from WormCat. Color denoted categories with a p value of less  
963 than 0.01 NS is not significant, NV is no value, RGS is regulated gene set.

964

965 **Table S4 (Microsoft Excel File). Limited activation of heat shock response in**  
966 ***sams-4* RNAi animals.** Tabs show RNA seq from control (**A**), *sams-1* (**B**) or *sams-4*  
967 (**C**) animals subjected to heat shock that was used for comparison with C&T data.  
968 Differential genes were identified using Deseq2 in DolphinNext. Data for control and  
969 *sams-1* RNAi animals is from Ding, et al 2018. WormCat batch output of two-fold  
970 regulated genes for Categories 1, 2 and 3 are in tabs E-G). Highlighting denotes genes  
971 with significantly p values. NS is not significant, NV is no value, RGS is regulated gene  
972 set.

973

974  
975  
976

## References

- 977 1. Ducker, G.S., and Rabinowitz, J.D. (2016). One-Carbon Metabolism in Health and  
978 Disease. *Cell Metab* 25. 10.1016/j.cmet.2016.08.009.
- 979 2. Mato, J.M., Martínez-Chantar, M.L., and Lu, S.C. (2008). Methionine Metabolism and  
980 Liver Disease. *Annu Rev Nutr* 28, 273–293. 10.1146/annurev.nutr.28.061807.155438.
- 981 3. Parkhitko, A.A., Jouandin, P., Mohr, S.E., and Perrimon, N. (2019). Methionine  
982 metabolism and methyltransferases in the regulation of aging and lifespan extension  
983 across species. *Aging Cell* 18, e13034. 10.1111/acel.13034.
- 984 4. Hansen, M.H.A.L.D.A.K.C. (2005). New Genes tied to Endocrine, Metabolic and  
985 Dietary Regulation of Lifespan from a *Caenorhabditis elegans* RNAi Screen. *Cell* 1, 119  
986 128. 10.1016/j.cell.2015.04.005.
- 987 5. Han, S., and Brunet, A. (2012). Histone methylation makes its mark on longevity.  
988 *Trends Cell Biol* 22, 42–49. 10.1016/j.tcb.2011.11.001.
- 989 6. Greer, E.L., Maures, T.J., Hauswirth, A.G., Green, E.M., Leeman, D.S., Maro, G.S.,  
990 Han, S., Banko, M.R., Gozani, O., and Brunet, A. (2010). Members of the H3K4  
991 trimethylation complex regulate lifespan in a germline-dependent manner in *C. elegans*.  
992 *Nature* 466, 383–387. 10.1038/nature09195.
- 993 7. Han, S., Schroeder, E.A., Silva-García, C.G., Hebestreit, K., Mair, W.B., and Brunet,  
994 A. (2017). Mono-unsaturated fatty acids link H3K4me3 modifiers to *C. elegans* lifespan.  
995 *Nature* 544, 185–190. 10.1038/nature21686.
- 996 8. Ye, C., and Tu, B.P. (2018). Sink into the Epigenome: Histones as Repositories That  
997 Influence Cellular Metabolism. *Trends Endocrinol Metabolism* 29, 626–637.  
998 10.1016/j.tem.2018.06.002.
- 999 9. Mentch, S.J., Mehrmohamadi, M., Huang, L., Liu, X., Gupta, D., Mattocks, D.,  
1000 Gómez Padilla, P., Ables, G., Bamman, M.M., Thalacker-Mercer, A.E., et al. (2015).  
1001 Histone Methylation Dynamics and Gene Regulation Occur through the Sensing of One-  
1002 Carbon Metabolism. *Cell Metab* 22. 10.1016/j.cmet.2015.08.024.
- 1003 10. Shyh-Chang, N., Locasale, J.W., Lyssiotis, C.A., Zheng, Y., Teo, R.Y.,  
1004 Ratanasirintrao, S., Zhang, J., Onder, T., Unternaehrer, J.J., Zhu, H., et al. (2013).  
1005 Influence of Threonine Metabolism on S-Adenosylmethionine and Histone Methylation.  
1006 *Science* 339, 222–226. 10.1126/science.1226603.
- 1007 11. Kraus, D., Yang, Q., Kong, D., Banks, A.S., Zhang, L., Rodgers, J.T., Pirinen, E.,  
1008 Pulinilkunnil, T.C., Gong, F., Wang, Y., et al. (2014). Nicotinamide N-methyltransferase

- 1009 knockdown protects against diet-induced obesity. *Nature* 508, 258–262.  
1010 [10.1038/nature13198](https://doi.org/10.1038/nature13198).
- 1011 12. Ding, W., Smulan, L.J., Hou, N.S., Taubert, S., Watts, J.L., and Walker, A.K. (2015).  
1012 s-Adenosylmethionine Levels Govern Innate Immunity through Distinct Methylation-  
1013 Dependent Pathways. *Cell Metab* 22, 633–645. [10.1016/j.cmet.2015.07.013](https://doi.org/10.1016/j.cmet.2015.07.013).
- 1014 13. Towbin, B.D., González-Aguilera, C., Sack, R., Gaidatzis, D., Kalck, V., Meister, P.,  
1015 Askjaer, P., and Gasser, S.M. (2012). Step-wise methylation of histone H3K9 positions  
1016 heterochromatin at the nuclear periphery. *Cell* 150, 934–947. [10.1016/j.cell.2012.06.051](https://doi.org/10.1016/j.cell.2012.06.051).
- 1017 14. Li, S., Swanson, S.K., Gogol, M., Florens, L., Washburn, M.P., Workman, J.L., and  
1018 Suganuma, T. (2015). Serine and SAM Responsive Complex SESAME Regulates  
1019 Histone Modification Crosstalk by Sensing Cellular Metabolism. *Mol Cell* 60, 408–421.  
1020 [10.1016/j.molcel.2015.09.024](https://doi.org/10.1016/j.molcel.2015.09.024).
- 1021 15. Liu, M., and Pile, L.A. (2017). The Transcriptional Corepressor SIN3 Directly  
1022 Regulates Genes Involved in Methionine Catabolism and Affects Histone Methylation,  
1023 Linking Epigenetics and Metabolism\*. *J Biol Chem* 292, 1970–1976.  
1024 [10.1074/jbc.m116.749754](https://doi.org/10.1074/jbc.m116.749754).
- 1025 16. Hoffert, K.M., Higginbotham, K.S.P., Gibson, J.T., Oehrle, S., and Strome, E.D.  
1026 (2019). Mutations in the S-adenosylmethionine Synthetase Genes, SAM1 and SAM2,  
1027 Differentially Impact Genome Stability in *Saccharomyces cerevisiae*. *Genetics* 213,  
1028 [genetics.302435.2019. 10.1534/genetics.119.302435](https://doi.org/10.1534/genetics.119.302435).
- 1029 17. Maldonado, L.Y., Arsene, D., Mato, J.M., and Lu, S.C. (2018). Methionine  
1030 adenosyltransferases in cancers: Mechanisms of dysregulation and implications for  
1031 therapy. *Exp Biol Med* 243, 107–117. [10.1177/1535370217740860](https://doi.org/10.1177/1535370217740860).
- 1032 18. Mato, J.M., Corrales, F.J., Lu, S.C., and Avila, M.A. (2002). S-Adenosylmethionine:  
1033 a control switch that regulates liver function. *FASEB Journal* 16, 15–26.
- 1034 19. Sullivan, M.R., Darnell, A.M., Reilly, M.F., Kunchok, T., Joesch-Cohen, L.,  
1035 Rosenberg, D., Ali, A., Rees, M.G., Roth, J.A., Lewis, C.A., et al. (2021). Methionine  
1036 synthase is essential for cancer cell proliferation in physiological folate environments.  
1037 *Nat Metabolism* 3, 1500–1511. [10.1038/s42255-021-00486-5](https://doi.org/10.1038/s42255-021-00486-5).
- 1038 20. Harris, T.W., Arnaboldi, V., Cain, S., Chan, J., Chen, W.J., Cho, J., Davis, P., Gao,  
1039 S., Grove, C.A., Kishore, R., et al. (2019). WormBase: a modern Model Organism  
1040 Information Resource. *Nucleic Acids Res* 48, D762–D767. [10.1093/nar/gkz920](https://doi.org/10.1093/nar/gkz920).
- 1041 21. Walker, A.K., Jacobs, R.L., Watts, J.L., Rottiers, V., Jiang, K., Finnegan, D.M.,  
1042 Shioda, T., Hansen, M., Yang, F., Niebergall, L.J., et al. (2011). A Conserved SREBP-  
1043 1/Phosphatidylcholine Feedback Circuit Regulates Lipogenesis in Metazoans. *Cell* 147,  
1044 840–852. [10.1016/j.cell.2011.09.045](https://doi.org/10.1016/j.cell.2011.09.045).

- 1045 22. Nadal, E. de, Ammerer, G., and Posas, F. (2011). Controlling gene expression in  
1046 response to stress. *Nat Rev Genet* 12, 833–845. 10.1038/nrg3055.
- 1047 23. Ding, W., Higgins, D.P., Yadav, D.K., Godbole, A.A., Pukkila-Worley, R., and  
1048 Walker, A.K. (2018). Stress-responsive and metabolic gene regulation are altered in low  
1049 S-adenosylmethionine. *Plos Genet* 14, e1007812. 10.1371/journal.pgen.1007812.
- 1050 24. Gerstein, M.B., Lu, Z.J., Nostrand, E.L.V., Cheng, C., Arshinoff, B.I., Liu, T., Yip,  
1051 K.Y., Robilotto, R., Rechtsteiner, A., Ikegami, K., et al. (2010). Integrative analysis of the  
1052 *Caenorhabditis elegans* genome by the modENCODE project. *Science* 330, 1775–1787.  
1053 10.1126/science.1196914.
- 1054 25. Kaletsky, R., Yao, V., Williams, A., Runnels, A.M., Tadych, A., Zhou, S.,  
1055 Troyanskaya, O.G., and Murphy, C.T. (2018). Transcriptome analysis of adult  
1056 *Caenorhabditis elegans* cells reveals tissue-specific gene and isoform expression. *Plos*  
1057 *Genet* 14, e1007559. 10.1371/journal.pgen.1007559.
- 1058 26. McGhee, J. (2007). The *C. elegans* intestine. *Wormbook*, 1–36.  
1059 10.1895/wormbook.1.133.1.
- 1060 27. Holdorf, A.D., Higgins, D.P., Hart, A.C., Boag, P.R., Pazour, G.J., Walhout, A.J.M.,  
1061 and Walker, A.K. (2019). WormCat: An Online Tool for Annotation and Visualization of  
1062 *Caenorhabditis elegans* Genome-Scale Data. *Genetics*, genetics.302919.2019.  
1063 10.1534/genetics.119.302919.
- 1064 28. Ye, C., Sutter, B.M., Wang, Y., Kuang, Z., and Tu, B.P. (2017). A Metabolic  
1065 Function for Phospholipid and Histone Methylation. *Mol Cell* 66, 180–193.e8.  
1066 10.1016/j.molcel.2017.02.026.
- 1067 29. Bannister, A.J., and Kouzarides, T. (2011). Regulation of chromatin by histone  
1068 modifications. *Cell Res* 21, 381–395. 10.1038/cr.2011.22.
- 1069 30. Shilatifard, A. (2012). The COMPASS family of histone H3K4 methylases:  
1070 mechanisms of regulation in development and disease pathogenesis. *Annu Rev*  
1071 *Biochem* 81, 65–95. 10.1146/annurev-biochem-051710-134100.
- 1072 31. Li, T., and Kelly, W.G. (2011). A role for Set1/MLL-related components in epigenetic  
1073 regulation of the *Caenorhabditis elegans* germ line. *Plos Genet* 7, e1001349.  
1074 10.1371/journal.pgen.1001349.
- 1075 32. Xiao, Y., Bedet, C., Robert, V.J.P., Simonet, T., Dunkelbarger, S., Rakotomalala, C.,  
1076 Soete, G., Korswagen, H.C., Strome, S., and Palladino, F. (2011). *Caenorhabditis*  
1077 *elegans* chromatin-associated proteins SET-2 and ASH-2 are differentially required for  
1078 histone H3 Lys 4 methylation in embryos and adult germ cells. *Proc National Acad Sci*  
1079 108, 8305–8310. 10.1073/pnas.1019290108.

- 1080 33. Wenzel, D., Palladino, F., and Jedrusik-Bode, M. (2011). Epigenetics in *C. elegans*:  
1081 facts and challenges. *Genesis* 49, 647–661. [10.1002/dvg.20762](https://doi.org/10.1002/dvg.20762).
- 1082 34. Eissenberg, J.C., and Shilatifard, A. (2010). Histone H3 lysine 4 (H3K4) methylation  
1083 in development and differentiation. *Dev Biol* 339, 240–249. [10.1016/j.ydbio.2009.08.017](https://doi.org/10.1016/j.ydbio.2009.08.017).
- 1084 35. Kaya-Okur, H.S., Wu, S.J., Codomo, C.A., Pledger, E.S., Bryson, T.D., Henikoff,  
1085 J.G., Ahmad, K., and Henikoff, S. (2019). CUT&Tag for efficient epigenomic profiling of  
1086 small samples and single cells. *Nat Commun* 10, 1930. [10.1038/s41467-019-09982-5](https://doi.org/10.1038/s41467-019-09982-5).
- 1087 36. Heinz, S., Benner, C., Spann, N., Bertolino, E., Lin, Y.C., Laslo, P., Cheng, J.X.,  
1088 Murre, C., Singh, H., and Glass, C.K. (2010). Simple Combinations of Lineage-  
1089 Determining Transcription Factors Prime cis-Regulatory Elements Required for  
1090 Macrophage and B Cell Identities. *Mol Cell* 38, 576–589. [10.1016/j.molcel.2010.05.004](https://doi.org/10.1016/j.molcel.2010.05.004).
- 1091 37. Zhu, L.J., Gazin, C., Lawson, N.D., Pagès, H., Lin, S.M., Lapointe, D.S., and Green,  
1092 M.R. (2010). ChIPpeakAnno: a Bioconductor package to annotate ChIP-seq and ChIP-  
1093 chip data. *Bmc Bioinformatics* 11, 237–237. [10.1186/1471-2105-11-237](https://doi.org/10.1186/1471-2105-11-237).
- 1094 38. Ho, J.W.K., Jung, Y.L., Liu, T., Alver, B.H., Lee, S., Ikegami, K., Sohn, K.-A.,  
1095 Minoda, A., Tolstorukov, M.Y., Appert, A., et al. (2014). Comparative analysis of  
1096 metazoan chromatin organization. *Nature* 512, 449–452. [10.1038/nature13415](https://doi.org/10.1038/nature13415).
- 1097 39. Pu, M., Ni, Z., Wang, M., Wang, X., Wood, J.G., Helfand, S.L., Yu, H., and Lee, S.S.  
1098 (2015). Trimethylation of Lys36 on H3 restricts gene expression change during aging  
1099 and impacts life span. *Gene Dev* 29, 718–731. [10.1101/gad.254144.114](https://doi.org/10.1101/gad.254144.114).
- 1100 40. Wan, Q.-L., Meng, X., Wang, C., Dai, W., Luo, Z., Yin, Z., Ju, Z., Fu, X., Yang, J.,  
1101 Ye, Q., et al. (2022). Histone H3K4me3 modification is a transgenerational epigenetic  
1102 signal for lipid metabolism in *Caenorhabditis elegans*. *Nat Commun* 13, 768.  
1103 [10.1038/s41467-022-28469-4](https://doi.org/10.1038/s41467-022-28469-4).
- 1104 41. Pu, M., Wang, M., Wang, W., Velayudhan, S.S., and Lee, S.S. (2018). Unique  
1105 patterns of trimethylation of histone H3 lysine 4 are prone to changes during aging in  
1106 *Caenorhabditis elegans* somatic cells. *Plos Genet* 14, e1007466.  
1107 [10.1371/journal.pgen.1007466](https://doi.org/10.1371/journal.pgen.1007466).
- 1108 42. Serizay, J., Dong, Y., Janes, J., Chesney, M., Cerrato, C., and Ahringer, J. (2020).  
1109 Distinctive regulatory architectures of germline-active and somatic genes in *C. elegans*.  
1110 *Genome Res*, gr.265934.120. [10.1101/gr.265934.120](https://doi.org/10.1101/gr.265934.120).
- 1111 43. Weiner, A., Chen, H.V., Liu, C.L., Rahat, A., Klien, A., Soares, L., Gudipati, M.,  
1112 Pfeffner, J., Regev, A., Buratowski, S., et al. (2012). Systematic dissection of roles for  
1113 chromatin regulators in a yeast stress response. *Plos Biol* 10, e1001369.  
1114 [10.1371/journal.pbio.1001369](https://doi.org/10.1371/journal.pbio.1001369).



- 1115 44. Morimoto, R.I. (2006). Stress, Aging, and Neurodegenerative Disease. *New Engl J*  
1116 *Medicine* 355, 2254–2255. 10.1056/nejmcibr065573.
- 1117 45. Mahat, D.B., Salamanca, H.H., Duarte, F.M., Danko, C.G., and Lis, J.T. (2016).  
1118 Mammalian Heat Shock Response and Mechanisms Underlying Its Genome-wide  
1119 Transcriptional Regulation. *Mol Cell* 62, 63–78. 10.1016/j.molcel.2016.02.025.
- 1120 46. Arda, H.E., Taubert, S., MacNeil, L.T., Conine, C.C., Tsuda, B., Gilst, M.V.,  
1121 Sequerra, R., Doucette-Stamm, L., Yamamoto, K.R., and Walhout, A.J.M. (2010).  
1122 Functional modularity of nuclear hormone receptors in a *Caenorhabditis elegans*  
1123 metabolic gene regulatory network. *Mol Syst Biol* 6, 367. 10.1038/msb.2010.23.
- 1124 47. Bulcha, J.T., Giese, G.E., Ali, Md.Z., Lee, Y.-U., Walker, M.D., Holdorf, A.D., Yilmaz,  
1125 L.S., Brewster, R.C., and Walhout, A.J.M. (2019). A Persistence Detector for Metabolic  
1126 Network Rewiring in an Animal. *Cell Reports* 26, 460–468.e4.  
1127 10.1016/j.celrep.2018.12.064.
- 1128 48. Cheng, C., and Kurdistani, S.K. (2022). Chromatin as a metabolic organelle:  
1129 Integrating the cellular flow of carbon with gene expression. *Mol Cell* 82, 8–9.  
1130 10.1016/j.molcel.2021.12.003.
- 1131 49. Hsieh, W.-C., Sutter, B.M., Ruess, H., Barnes, S.D., Malladi, V.S., and Tu, B.P.  
1132 (2022). Glucose starvation induces a switch in the histone acetylome for activation of  
1133 gluconeogenic and fat metabolism genes. *Mol Cell* 82, 60–74.e5.  
1134 10.1016/j.molcel.2021.12.015.
- 1135 50. Wellen, K.E., Hatzivassiliou, G., Sachdeva, U.M., Bui, T.V., Cross, J.R., and  
1136 Thompson, C.B. (2009). ATP-Citrate Lyase Links Cellular Metabolism to Histone  
1137 Acetylation. *Science* 324, 1076–1080. 10.1126/science.1164097.
- 1138 51. Mentch, S.J., and Locasale, J.W. (2016). One-carbon metabolism and epigenetics:  
1139 understanding the specificity. *Ann Ny Acad Sci* 1363, 91–98. 10.1111/nyas.12956.
- 1140 52. Walsh, C.T., Tu, B.P., and Tang, Y. (2017). Eight Kinetically Stable but  
1141 Thermodynamically Activated Molecules that Power Cell Metabolism. *Chem Rev* 118,  
1142 *acs.chemrev.7b00510*. 10.1021/acs.chemrev.7b00510.
- 1143 53. Lu, S.C., Alvarez, L., Huang, Z.-Z., Chen, L., An, W., Corrales, F.J., Avila, M.A.,  
1144 Kanel, G., and Mato, J.M. (2001). Methionine adenosyltransferase 1A knockout mice  
1145 are predisposed to liver injury and exhibit increased expression of genes involved in  
1146 proliferation. *Proc National Acad Sci* 98, 5560–5565. 10.1073/pnas.091016398.
- 1147 54. Annibal, A., Tharyan, R.G., Schonewolff, M.F., Tam, H., Latza, C., Auler, M.M.K.,  
1148 Grönke, S., Partridge, L., and Antebi, A. (2021). Regulation of the one carbon folate  
1149 cycle as a shared metabolic signature of longevity. *Nat Commun* 12, 3486.  
1150 10.1038/s41467-021-23856-9.

- 1151 55. Gao, X., Sanderson, S.M., Dai, Z., Reid, M.A., Cooper, D.E., Lu, M., Richie, J.P.,  
1152 Ciccarella, A., Calcagnotto, A., Mikhael, P.G., et al. (2019). Dietary methionine links  
1153 nutrition and metabolism to the efficacy of cancer therapies. *Nature* 572, 397–401.  
1154 10.1038/s41586-019-1437-3.
- 1155 56. Sun, Y., and Locasale, J.W. (2021). Rethinking the bioavailability and cellular  
1156 transport properties of S-adenosylmethionine. *Cell Stress* 6, 1–5.  
1157 10.15698/cst2022.01.261.
- 1158 57. Tang, S., Fang, Y., Huang, G., Xu, X., Padilla-Banks, E., Fan, W., Xu, Q.,  
1159 Sanderson, S.M., Foley, J.F., Dowdy, S., et al. (2017). Methionine metabolism is  
1160 essential for SIRT1-regulated mouse embryonic stem cell maintenance and embryonic  
1161 development. *Embo J* 36, 3175–3193. 10.15252/embj.201796708.
- 1162 58. Dai, Z., Mentch, S.J., Gao, X., Nichenametla, S.N., and Locasale, J.W. (2018).  
1163 Methionine metabolism influences genomic architecture and gene expression through  
1164 H3K4me3 peak width. *Nat Commun* 9, 1955. 10.1038/s41467-018-04426-y.
- 1165 59. Murray, B., Barbier-Torres, L., Fan, W., Mato, J.M., and Lu, S.C. (2019). Methionine  
1166 adenosyltransferases in liver cancer. *World J Gastroentero* 25, 4300–4319.  
1167 10.3748/wjg.v25.i31.4300.
- 1168 60. Greco, C.M., Cervantes, M., Fustin, J.-M., Ito, K., Ceglia, N., Samad, M., Shi, J.,  
1169 Koronowski, K.B., Forne, I., Ranjit, S., et al. (2020). S-adenosyl-L-homocysteine  
1170 hydrolase links methionine metabolism to the circadian clock and chromatin remodeling.  
1171 *Sci Adv* 6, eabc5629. 10.1126/sciadv.abc5629.
- 1172 61. Hödl, M., and Basler, K. (2012). Transcription in the Absence of Histone H3.2 and  
1173 H3K4 Methylation. *Curr Biol* 22, 2253–2257. 10.1016/j.cub.2012.10.008.
- 1174 62. Das, S., Min, S., and Prahlad, V. (2021). Gene bookmarking by the heat shock  
1175 transcription factor programs the insulin-like signaling pathway. *Mol Cell* 81, 4843-  
1176 4860.e8. 10.1016/j.molcel.2021.09.022.
- 1177 63. Yukselen, O., Turkyilmaz, O., Ozturk, A.R., Garber, M., and Kucukural, A. (2020).  
1178 DolphinNext: a distributed data processing platform for high throughput genomics. *Bmc*  
1179 *Genomics* 21, 310. 10.1186/s12864-020-6714-x.
- 1180 64. Kucukural, A., Yukselen, O., Ozata, D.M., Moore, M.J., and Garber, M. (2019).  
1181 DEBrowser: interactive differential expression analysis and visualization tool for count  
1182 data. *Bmc Genomics* 20, 6. 10.1186/s12864-018-5362-x.
- 1183 65. Hulsen, T., Vlieg, J. de, and Alkema, W. (2008). BioVenn – a web application for the  
1184 comparison and visualization of biological lists using area-proportional Venn diagrams.  
1185 *Bmc Genomics* 9, 488. 10.1186/1471-2164-9-488.

- 1186 66. Higgins, D.P., Weisman, C.M., Lui, D.S., D'Agostino, F.A., and Walker, A.K. (2022).  
1187 Defining characteristics and conservation of poorly annotated genes in *Caenorhabditis*  
1188 *elegans* using WormCat 2.0. *Genetics*. 10.1093/genetics/iyac085.
- 1189 67. Kaya-Okur, H.S., Wu, S.J., Codomo, C.A., Pledger, E.S., Bryson, T.D., Henikoff,  
1190 J.G., Ahmad, K., and Henikoff, S. (2019). CUT&Tag for efficient epigenomic profiling of  
1191 small samples and single cells. *Nat Commun* 10, 1930. 10.1038/s41467-019-09982-5.
- 1192 68. Langmead, B., Trapnell, C., Pop, M., and Salzberg, S.L. (2009). Ultrafast and  
1193 memory-efficient alignment of short DNA sequences to the human genome. *Genome*  
1194 *Biol* 10, R25–R25. 10.1186/gb-2009-10-3-r25.
- 1195 69. Ramírez, F., Ryan, D.P., Grüning, B., Bhardwaj, V., Kilpert, F., Richter, A.S., Heyne,  
1196 S., Dündar, F., and Manke, T. (2016). deepTools2: a next generation web server for  
1197 deep-sequencing data analysis. *Nucleic Acids Res* 44, W160–W165.  
1198 10.1093/nar/gkw257.
- 1199
- 1200

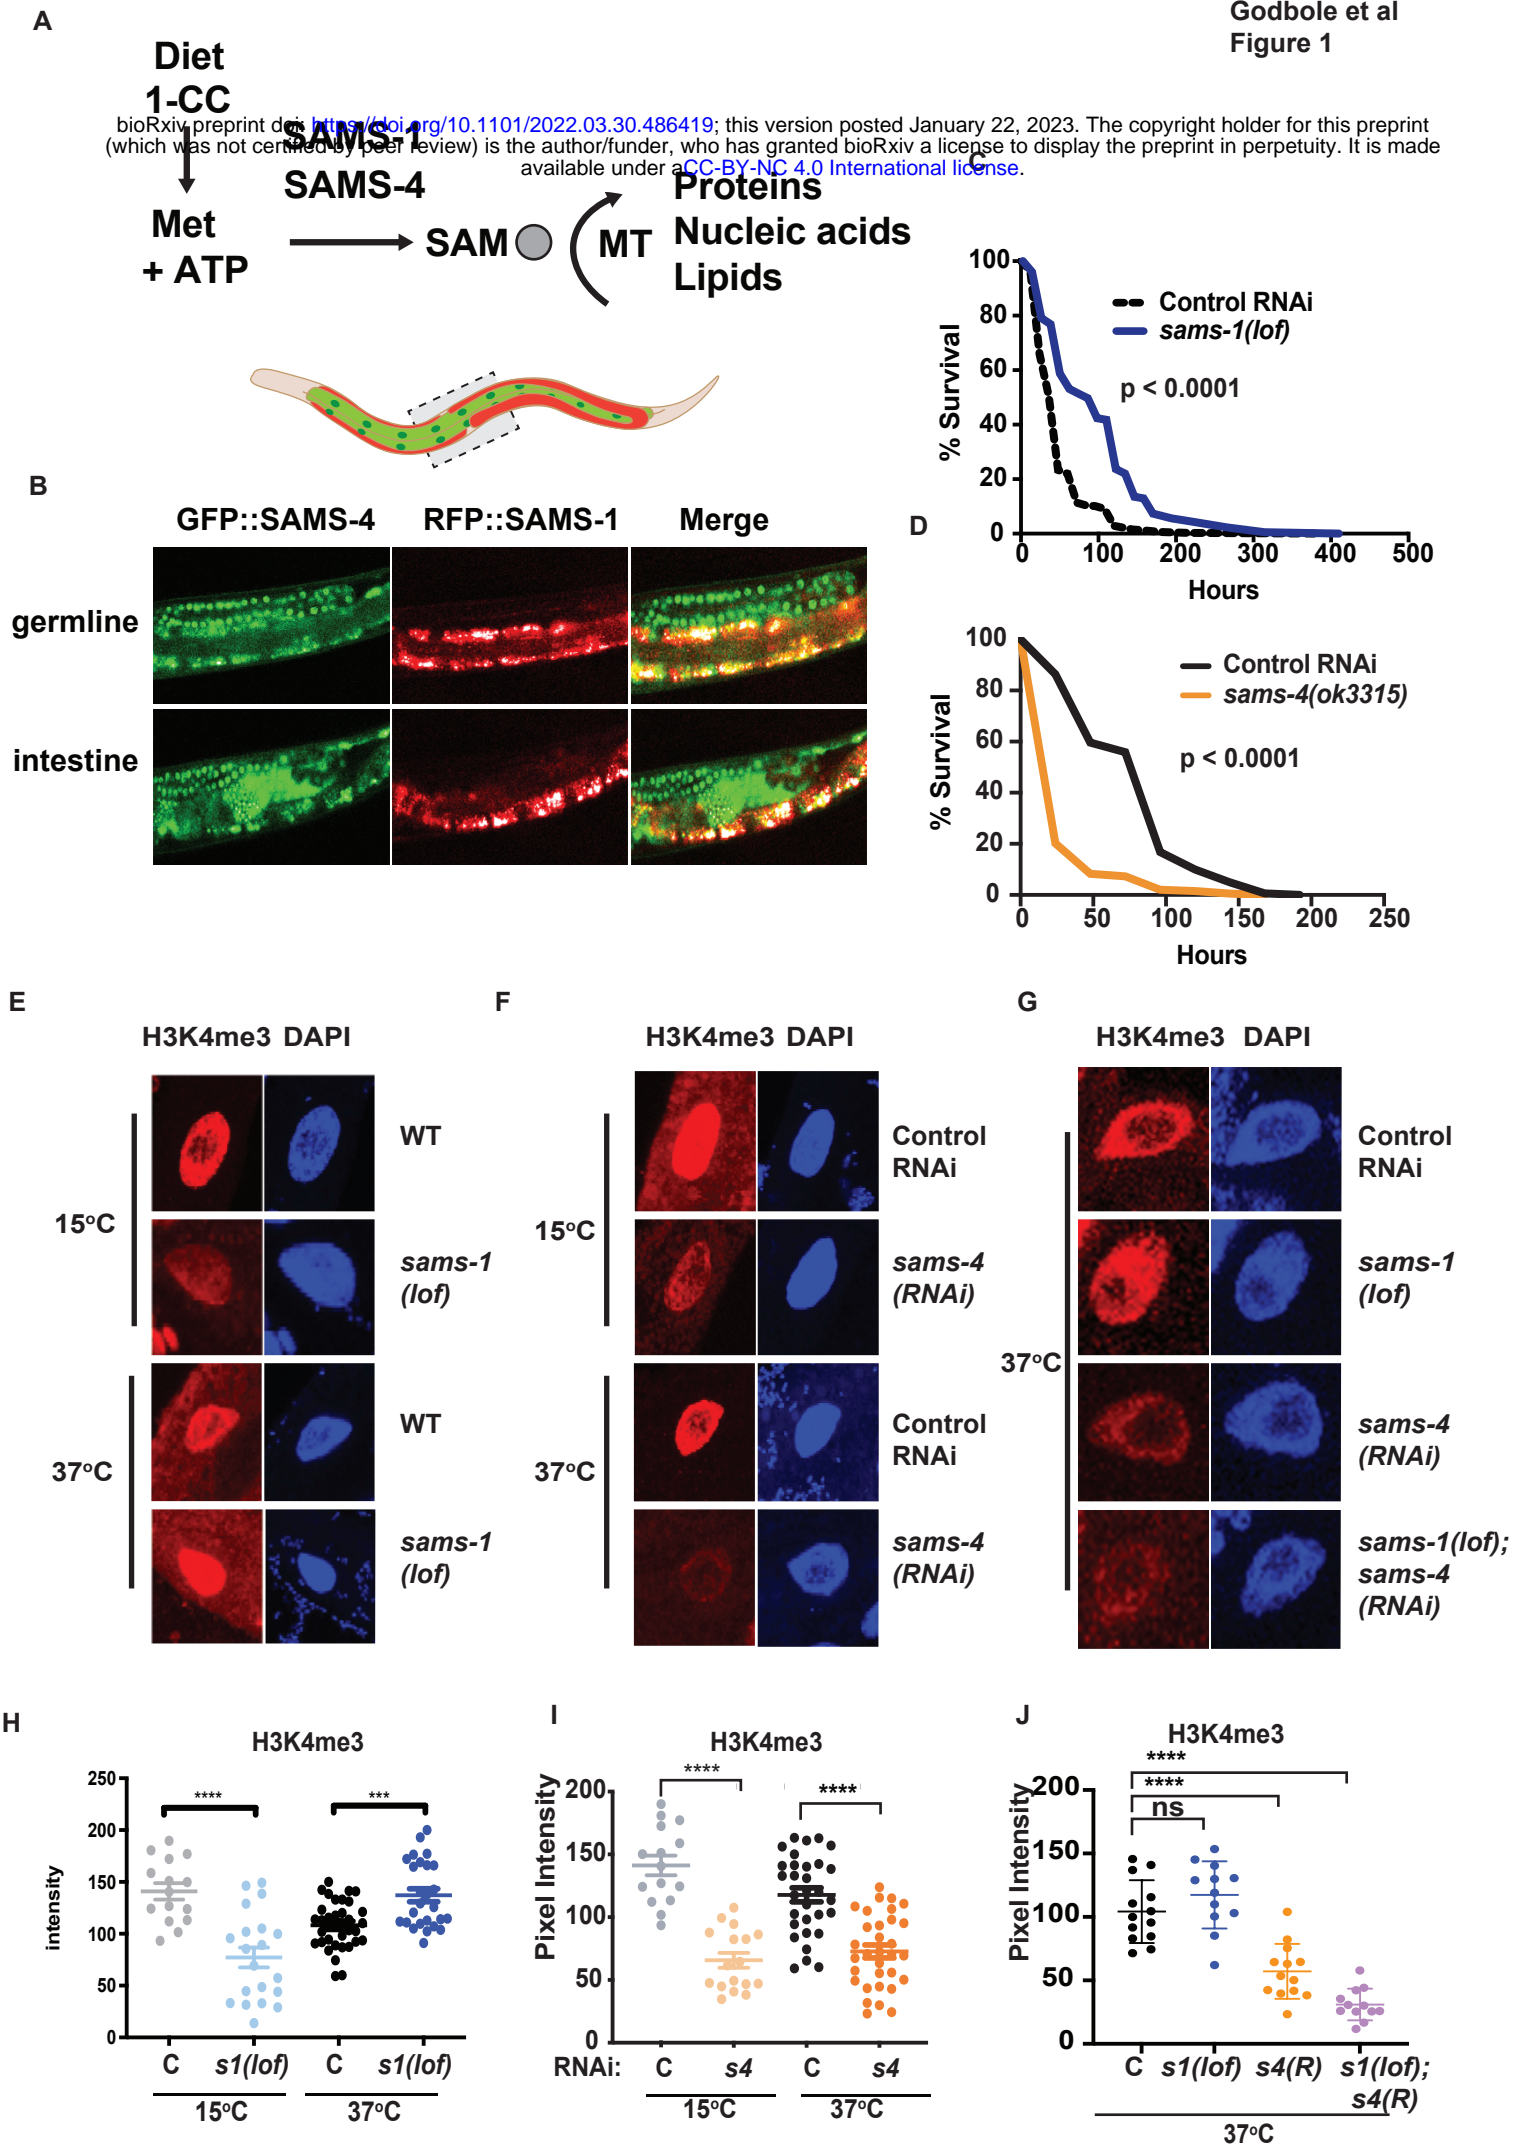

bioRxiv preprint doi: <https://doi.org/10.1101/2022.03.30.486419>; this version posted January 22, 2023. The copyright holder for this preprint (which was not certified by peer review) is the author/funder, who has granted bioRxiv a license to display the preprint in perpetuity. It is made available under aCC-BY-NC 4.0 International license.

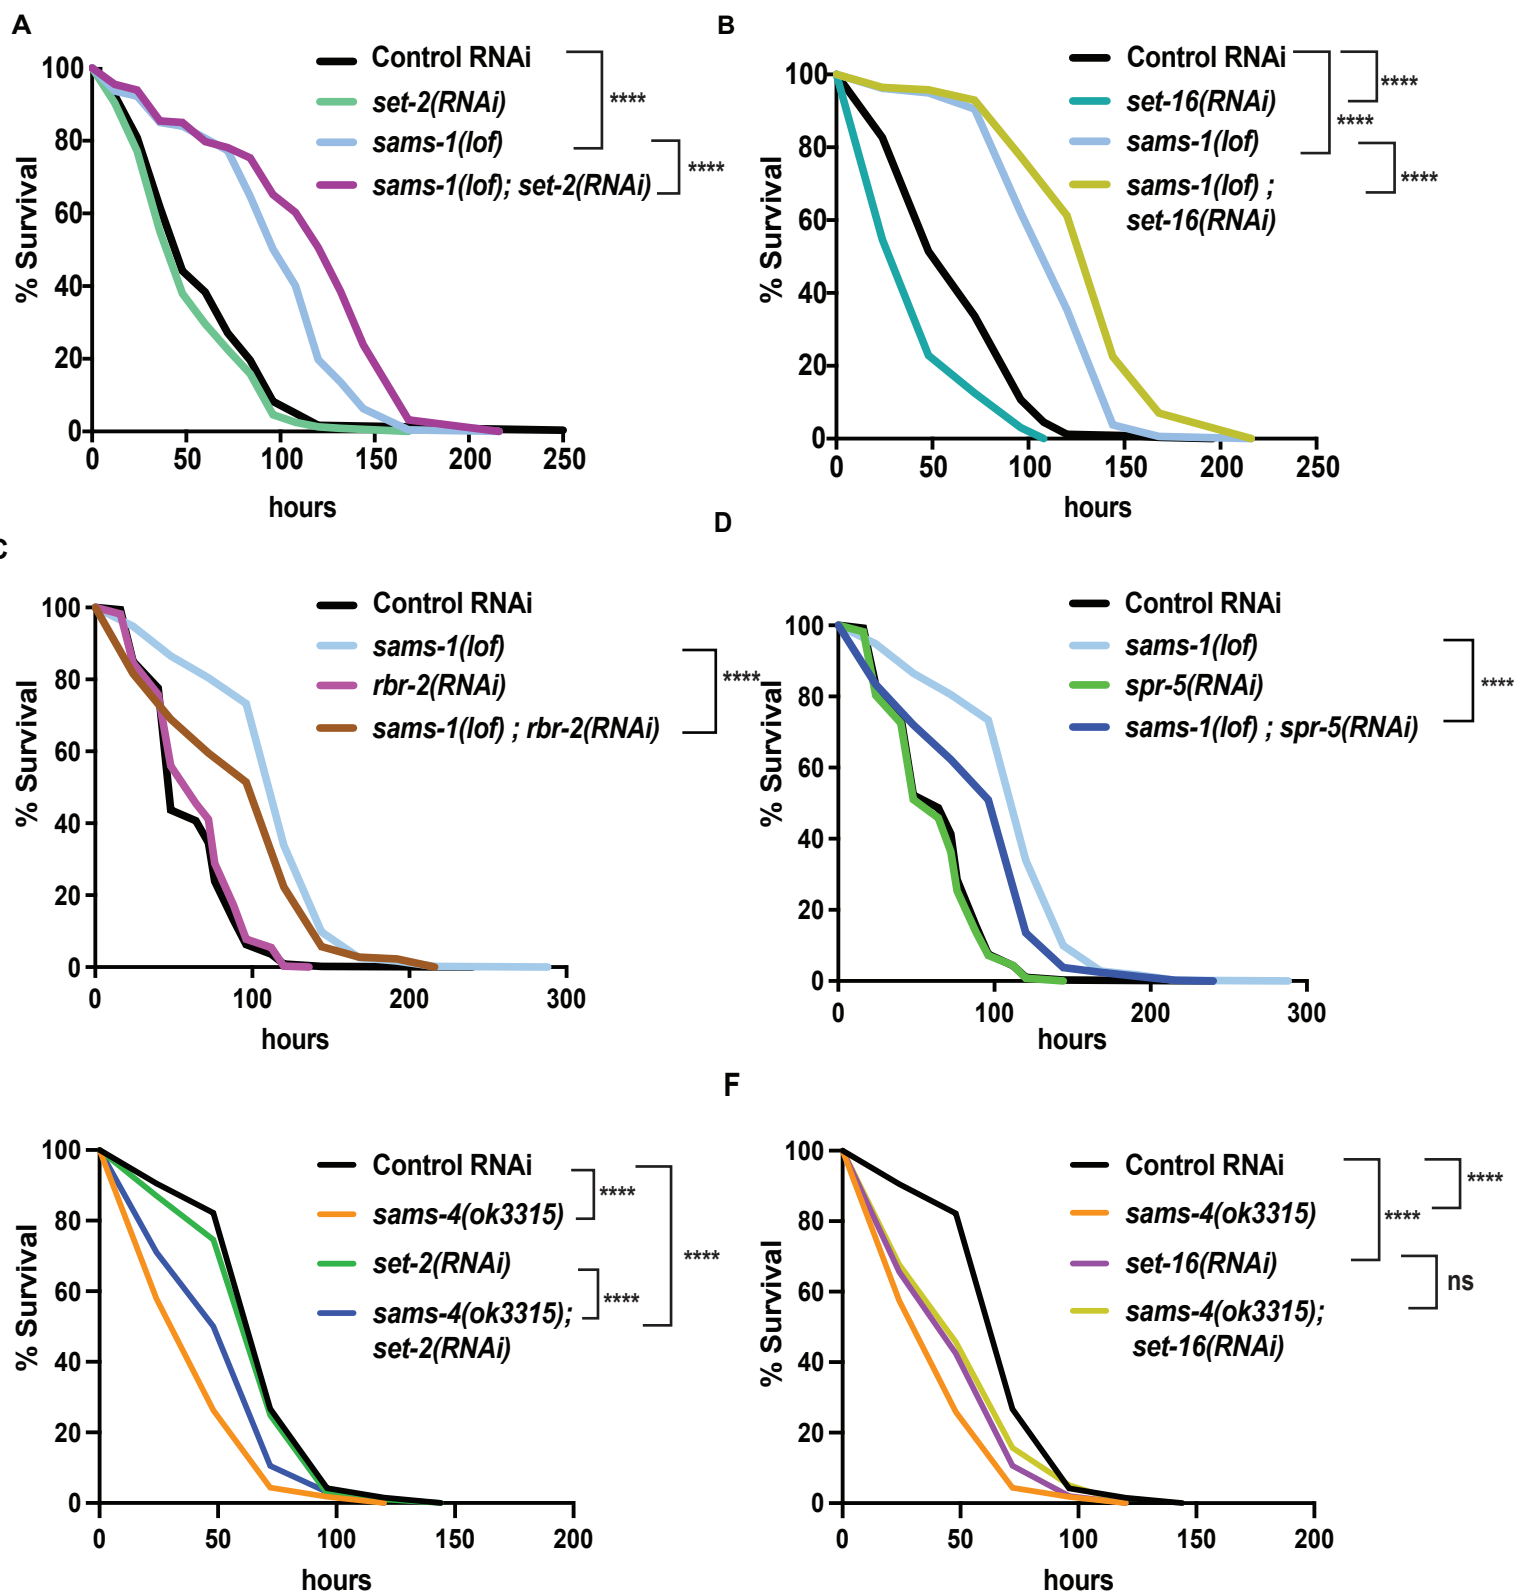

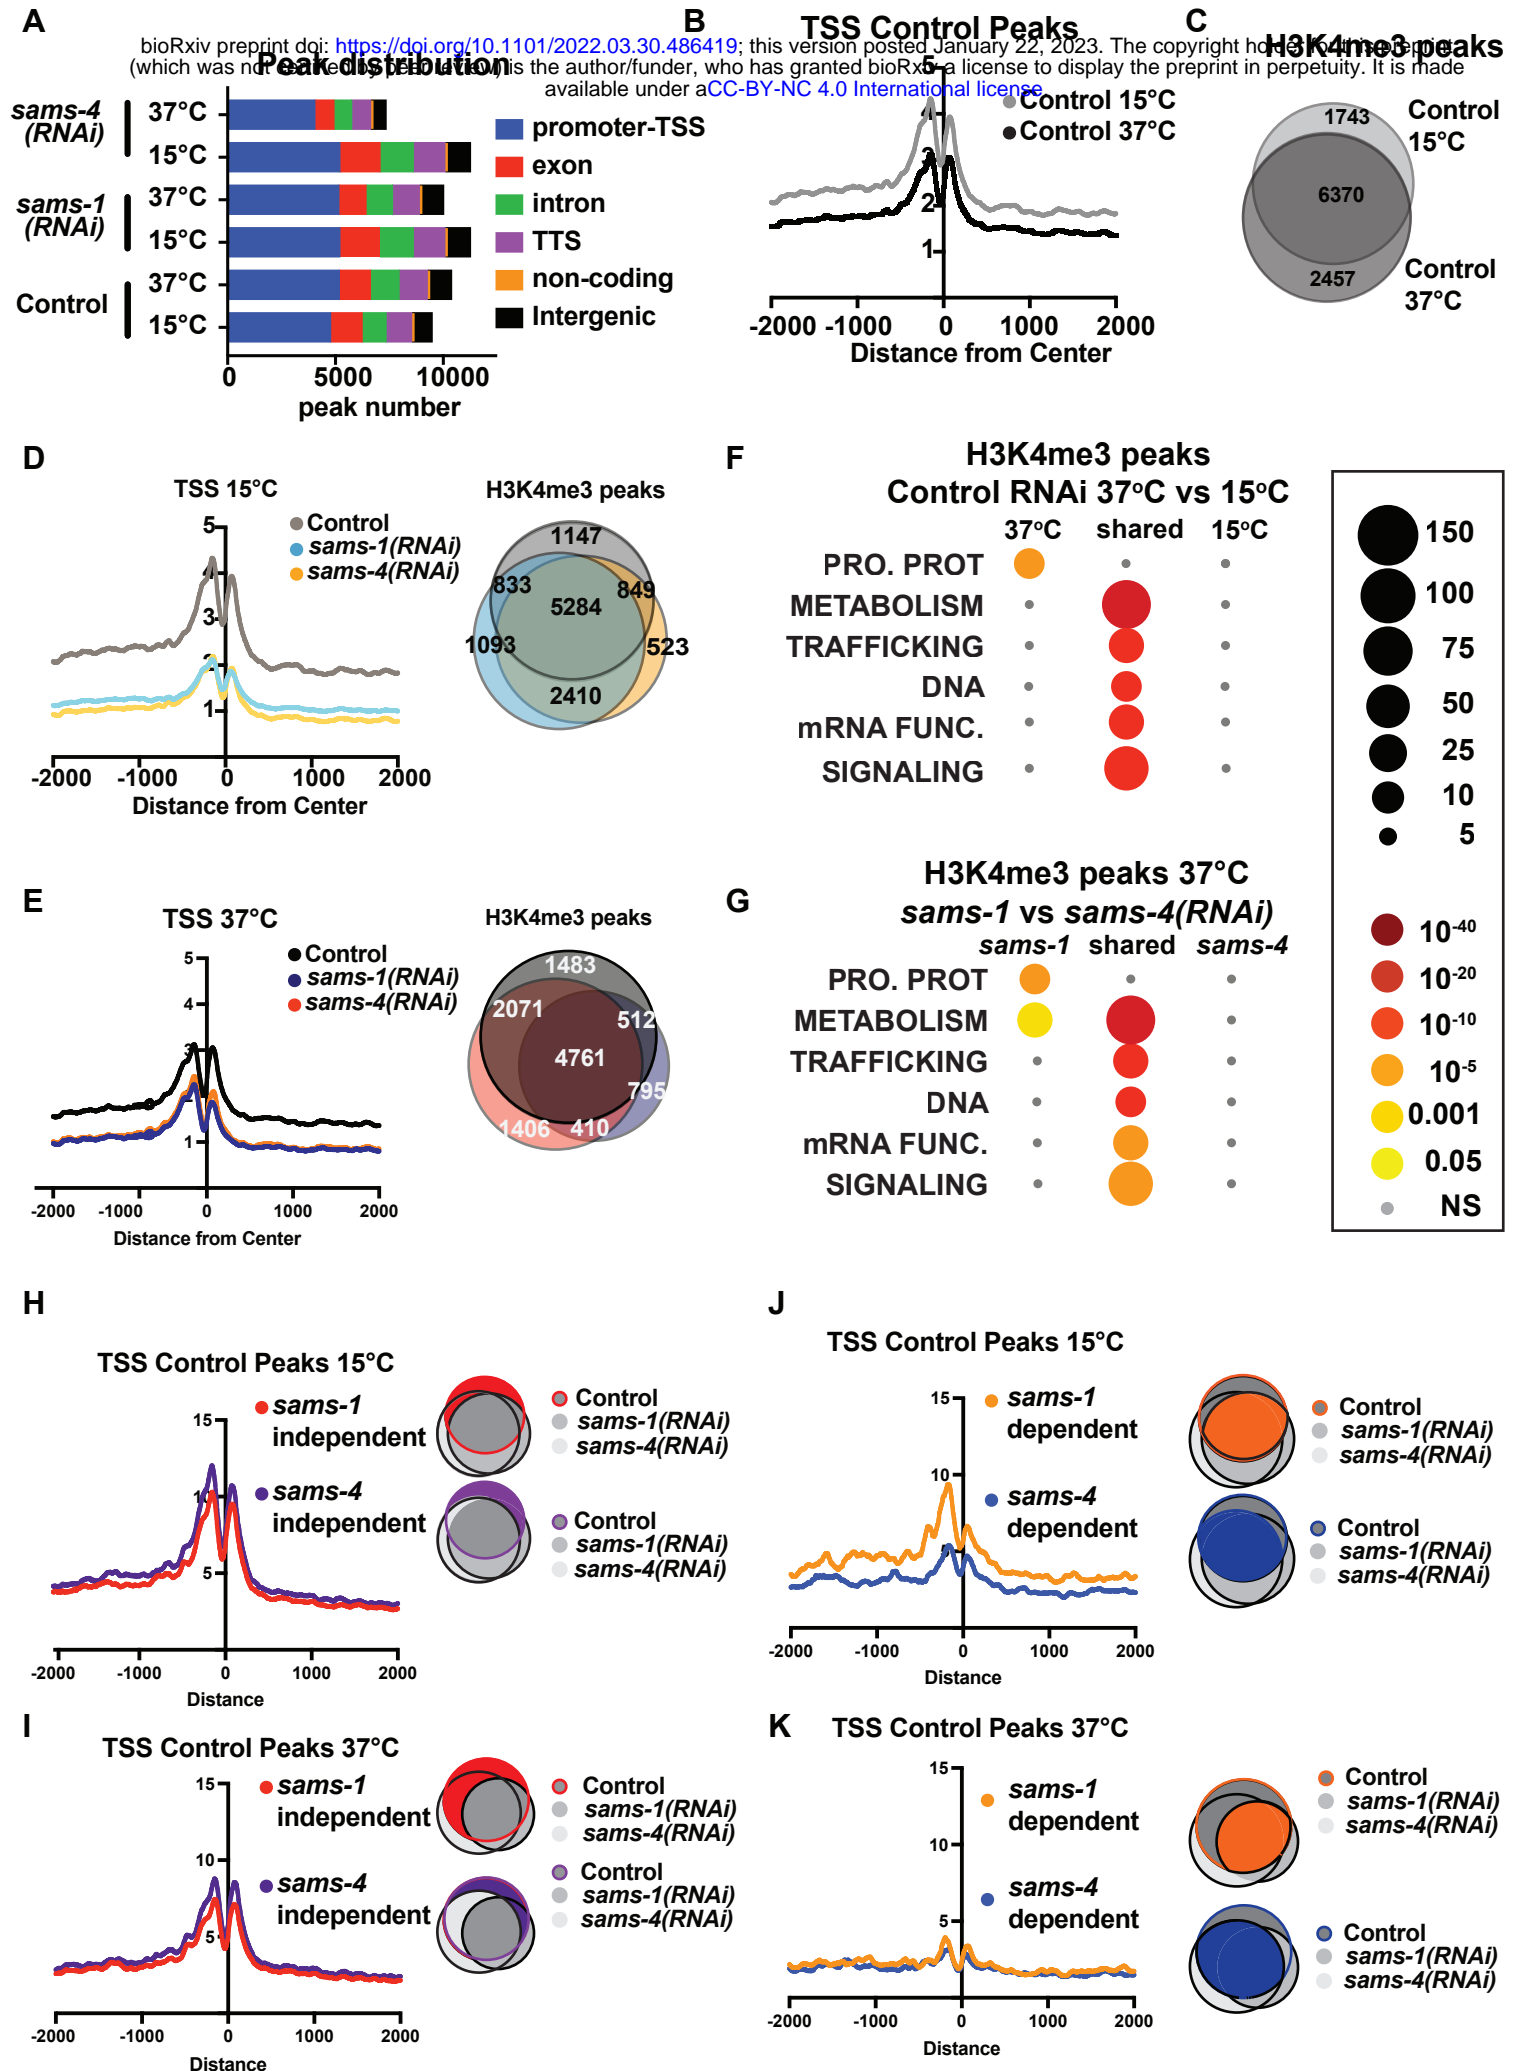

A

UP Genes (15°C vs 37°C)

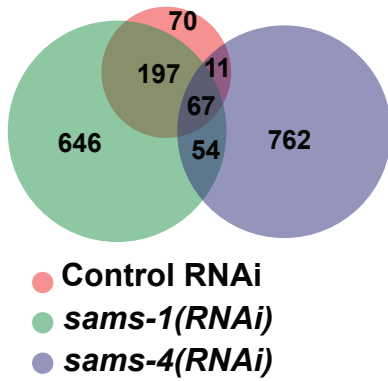

B

UP Genes (15°C vs 37°C)

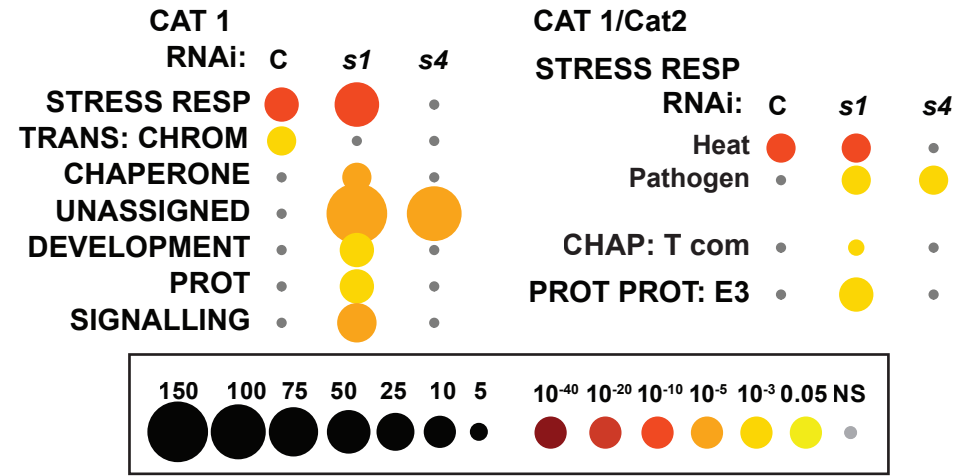

C

UP Genes:  
 HSP, Chaperone,  
 Proteosome

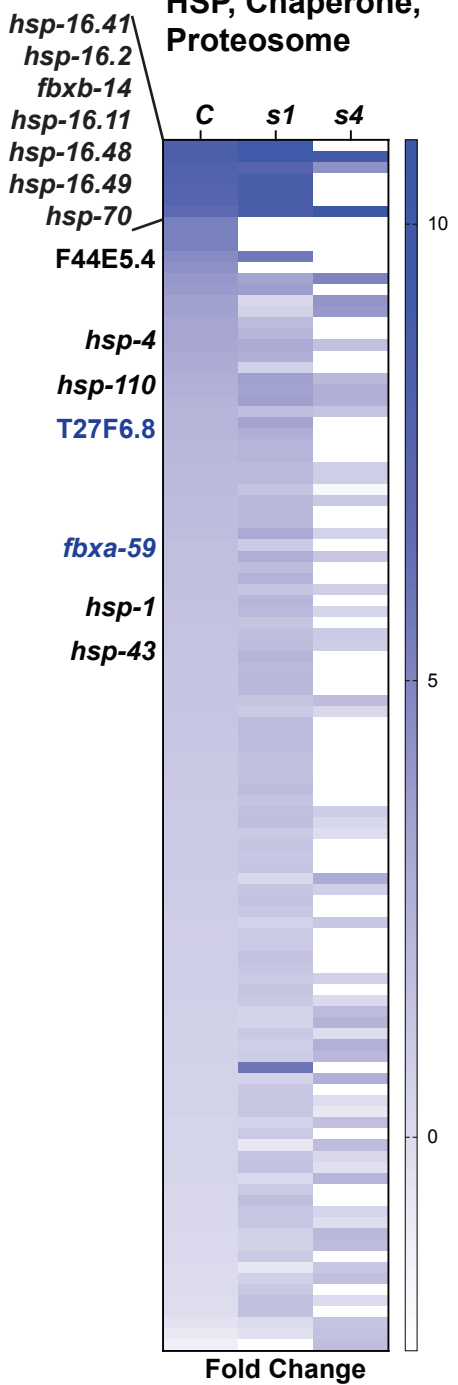

D

TSS: Control 15°C Peaks

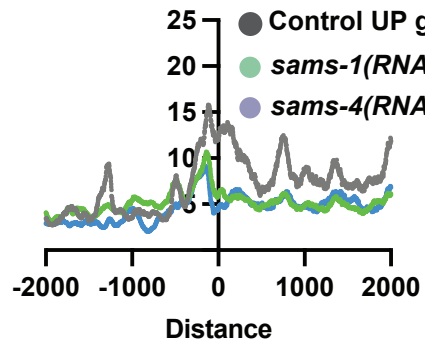

E

TSS: Control 37°C Peaks

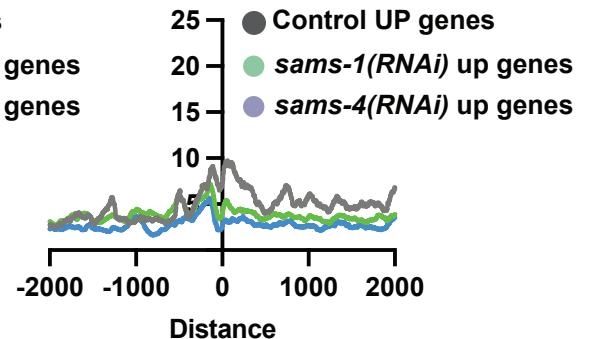

F

TSS: Control 15°C Peaks

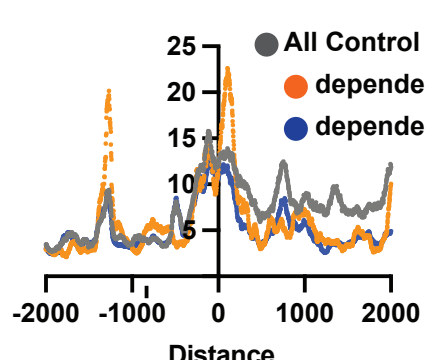

G

TSS: Control 37°C Peaks

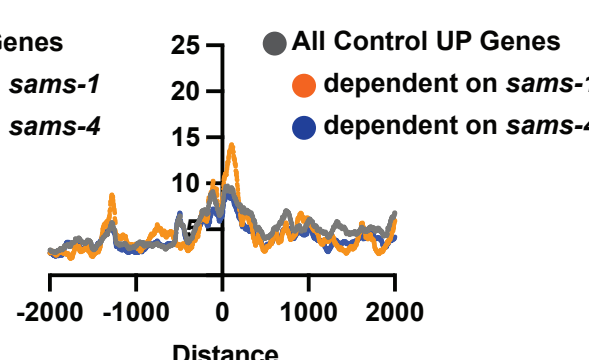

H

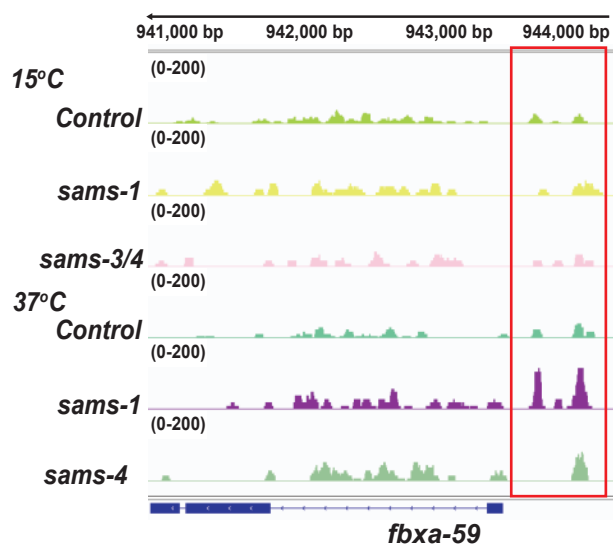

I

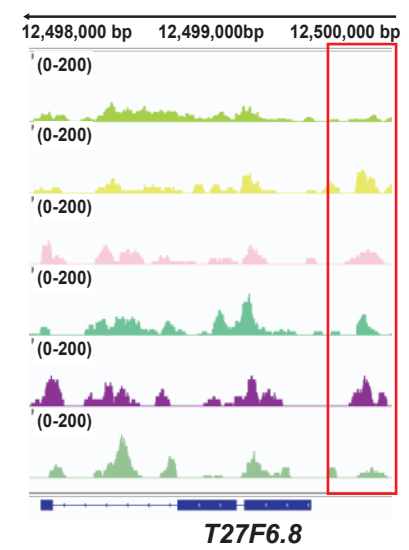

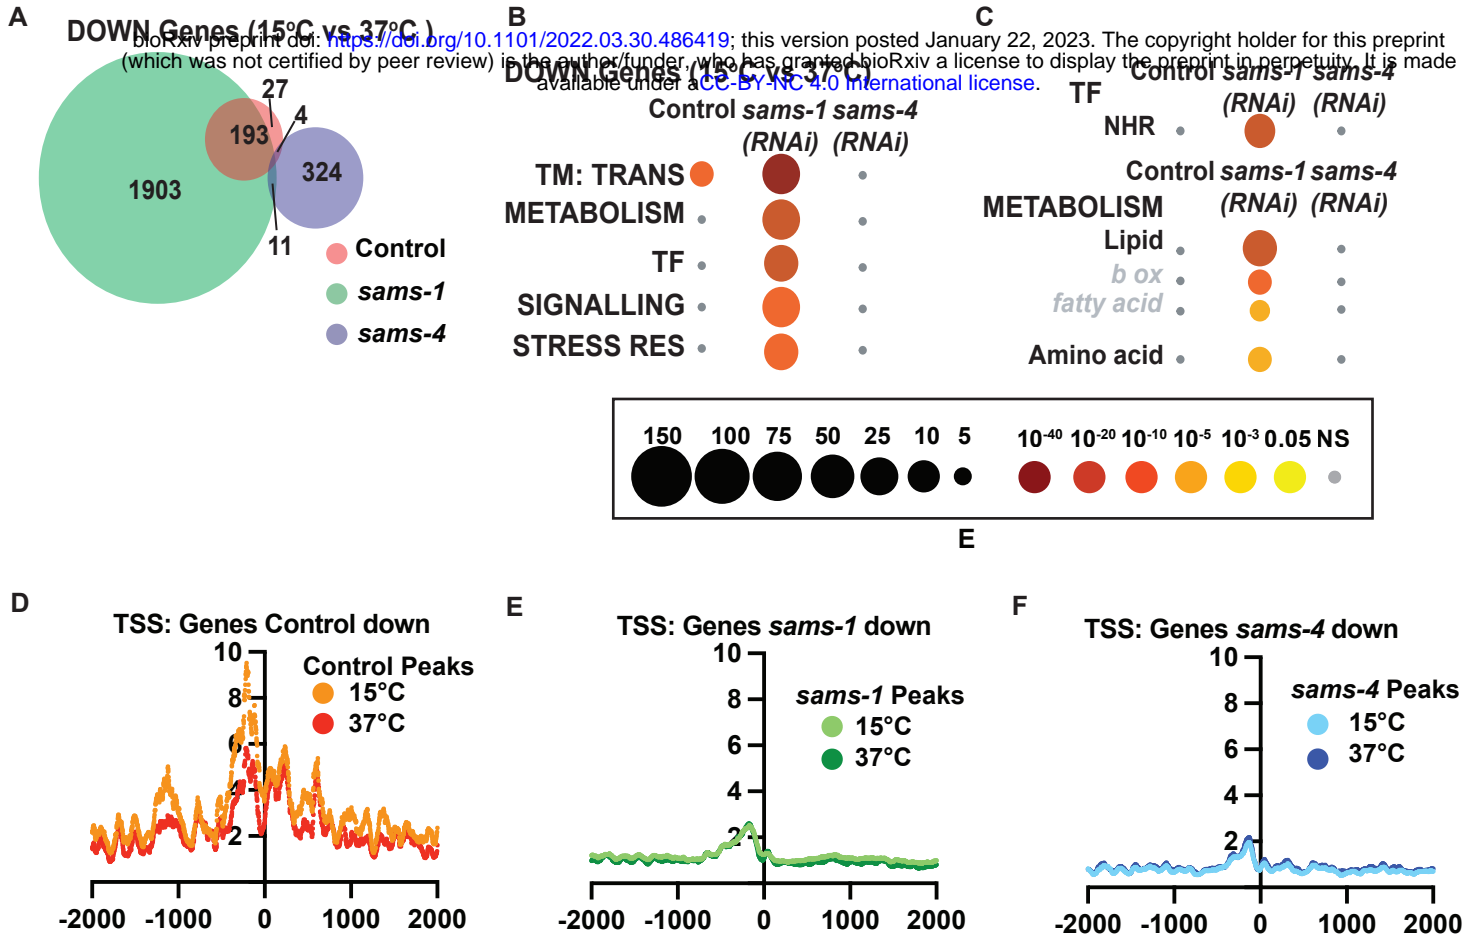



A

bioRxiv preprint doi: <https://doi.org/10.1101/2022.03.30.486419>; this version posted January 22, 2023. The copyright holder for this preprint (which was not certified by peer review) is the author/funder, who has granted bioRxiv a license to display the preprint in perpetuity. It is made available under aCC-BY-NC 4.0 International license.

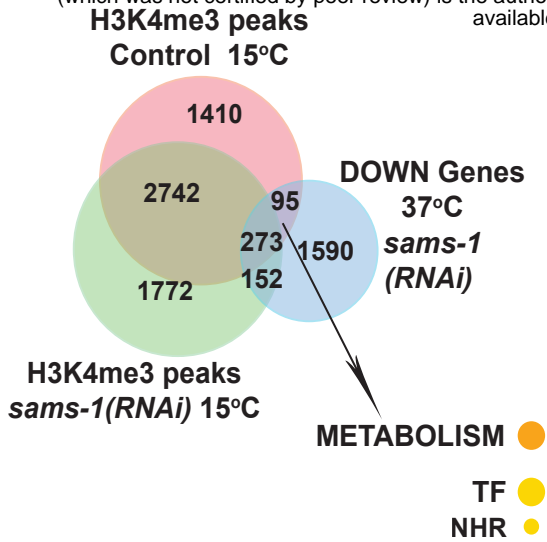

B

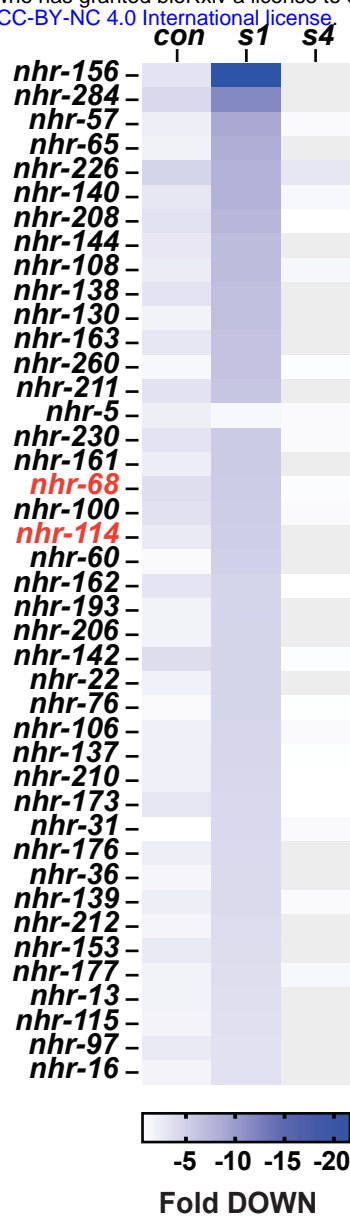

C

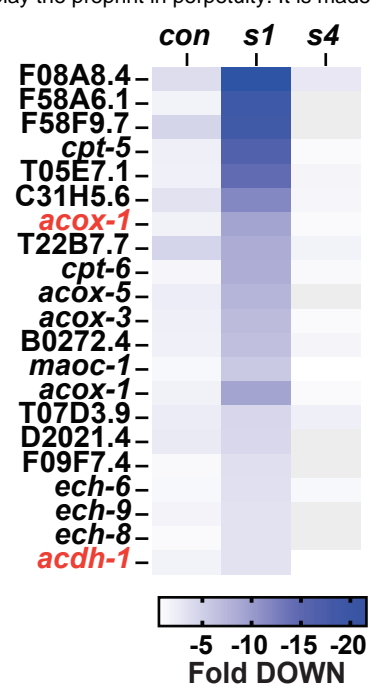

D

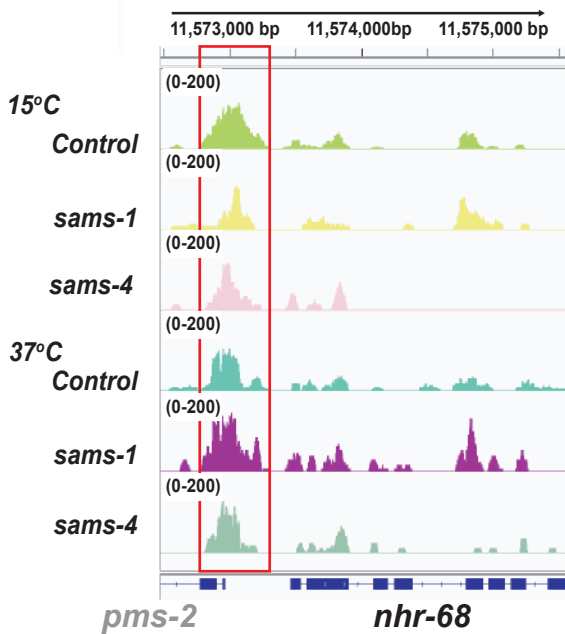

E

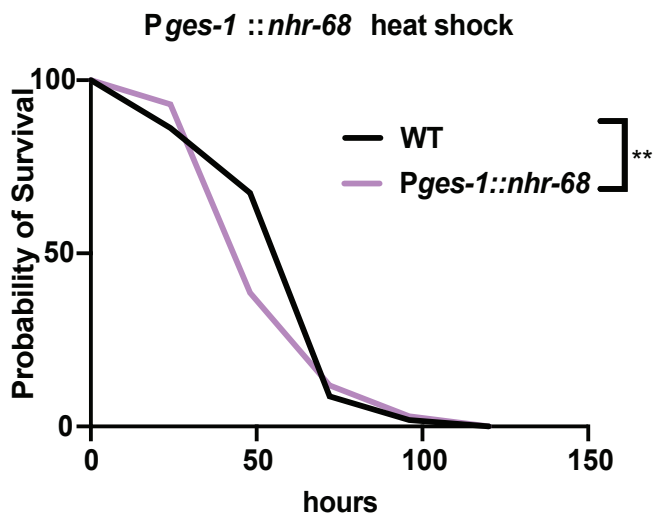

Source: https://www.biorxiv.org/content/10.1101/2022.03.30.486419v2.full.pdf
